# Supplementary material for: Product attributes important to US adult consumers’ use of electronic nicotine delivery systems: a discrete choice experiment
Source: PubMed Central journal article supplement — BMJ Open. 2019 Aug 15;9(8):e027247. doi: 10.1136/bmjopen-2018-027247 (PMC6701580; doi:10.1136/bmjopen-2018-027247), 2019-08-15
Supplement: bmjopen-2018-027247.draft_revisions.pdf [file bmjopen-2018-027247.draft_revisions.pdf]

# BMJ Open

BMJ Open is committed to open peer review. As part of this commitment we make the peer review history of every article we publish publicly available.

When an article is published we post the peer reviewers' comments and the authors' responses online. We also post the versions of the paper that were used during peer review. These are the versions that the peer review comments apply to.

The versions of the paper that follow are the versions that were submitted during the peer review process. They are not the versions of record or the final published versions. They should not be cited or distributed as the published version of this manuscript.

BMJ Open is an open access journal and the full, final, typeset and author-corrected version of record of the manuscript is available on our site with no access controls, subscription charges or pay-per-view fees (<http://bmjopen.bmj.com>).

If you have any questions on BMJ Open's open peer review process please email [info.bmjopen@bmj.com](mailto:info.bmjopen@bmj.com)

# BMJ Open

## Product Attributes Important to Adult Consumers' Use of Electronic Nicotine Delivery Systems: a Discrete Choice Experiment

|                               |                                                                                                                                                                                                                                                                                                                                                                                                                                                                                                                                                                                                                                                                                                                                                                                                                                                                                                           |
|-------------------------------|-----------------------------------------------------------------------------------------------------------------------------------------------------------------------------------------------------------------------------------------------------------------------------------------------------------------------------------------------------------------------------------------------------------------------------------------------------------------------------------------------------------------------------------------------------------------------------------------------------------------------------------------------------------------------------------------------------------------------------------------------------------------------------------------------------------------------------------------------------------------------------------------------------------|
| Journal:                      | <i>BMJ Open</i>                                                                                                                                                                                                                                                                                                                                                                                                                                                                                                                                                                                                                                                                                                                                                                                                                                                                                           |
| Manuscript ID                 | bmjopen-2018-027247                                                                                                                                                                                                                                                                                                                                                                                                                                                                                                                                                                                                                                                                                                                                                                                                                                                                                       |
| Article Type:                 | Research                                                                                                                                                                                                                                                                                                                                                                                                                                                                                                                                                                                                                                                                                                                                                                                                                                                                                                  |
| Date Submitted by the Author: | 13-Nov-2018                                                                                                                                                                                                                                                                                                                                                                                                                                                                                                                                                                                                                                                                                                                                                                                                                                                                                               |
| Complete List of Authors:     | Kistler, Christine E ; The University of North Carolina at Chapel Hill, Family Medicine<br>Ranney, Leah; University of North Carolina School of Medicine, Family Medicine; University of North Carolina at Chapel Hill, Family Medicine<br>Sutfin, Erin; Wake Forest School of Medicine, Public Health Sciences<br>Chrzan, Keith ; Sawtooth Analytics<br>Wretman, Christopher; The University of North Carolina at Chapel Hill, Cecil G. Sheps Center for Health Services Research<br>Enyioha, Chineme; The University of North Carolina at Chapel Hill, Family Medicine<br>Meernik, Clare ; University of North Carolina at Chapel Hill School of Medicine, Family Medicine<br>Berman, Micah; Ohio State University College of Public Health, Health Services Management and Policy<br>Zarkin, Gary; RTI International<br>Goldstein, A; University of North Carolina School of Medicine, Family Medicine |
| Keywords:                     | electronic nicotine delivery system, vaping, e-cigarettes, attributes, preference                                                                                                                                                                                                                                                                                                                                                                                                                                                                                                                                                                                                                                                                                                                                                                                                                         |
|                               |                                                                                                                                                                                                                                                                                                                                                                                                                                                                                                                                                                                                                                                                                                                                                                                                                                                                                                           |

SCHOLARONE™  
Manuscripts

1  
2  
3 **Product Attributes Important to Adult Consumers' Use of Electronic Nicotine Delivery**  
4  
5 **Systems: a Discrete Choice Experiment**  
6  
7

8 **Authors:**  
9

10  
11 Christine E. Kistler, MD, MASc<sup>1,2,3</sup>  
12

13  
14 Leah M. Ranney, PhD, MA<sup>1,2</sup>  
15

16  
17 Erin L. Sutfin, PhD<sup>4</sup>  
18

19  
20 Keith Chrzan, MBA<sup>5</sup>  
21

22  
23 Christopher J. Wretman, PhD<sup>3</sup>  
24

25  
26 Chineme Enyioha, MD<sup>1</sup>  
27

28  
29 Clare Meernik, MPH<sup>1</sup>  
30

31  
32 Micah L. Berman, JD<sup>6</sup>  
33

34  
35 Gary A. Zarkin, PhD, MA<sup>7</sup>  
36

37  
38 Adam O. Goldstein, MD, MPH<sup>1,2</sup>  
39

40  
41 <sup>1</sup>Department of Family Medicine, School of Medicine, University of North Carolina at Chapel  
42 Hill, Chapel Hill, NC  
43

44  
45  
46 <sup>2</sup>Lineberger Comprehensive Cancer Center, University of North Carolina at Chapel Hill, Chapel  
47 Hill, NC  
48

49  
50  
51 <sup>3</sup>Cecil B. Sheps Center for Health Services Research, University of North Carolina at Chapel  
52 Hill, Chapel Hill, NC  
53

1  
2  
3  
4  
5  
6  
7  
8  
9  
10  
11  
12  
13  
14  
15  
16  
17  
18  
19  
20  
21  
22  
23  
24  
25  
26  
27  
28  
29  
30  
31  
32  
33  
34  
35  
36  
37  
38  
39  
40  
41  
42  
43  
44  
45  
46  
47  
48  
49  
50  
51  
52  
53  
54  
55  
56  
57  
58  
59  
60

<sup>4</sup>Department of Social Science and Health Policy, Wake Forest School of Medicine, Winston-Salem, NC

<sup>5</sup>Sawtooth Analytics

<sup>6</sup>College of Public Health & Moritz College of Law, Ohio State University, Columbus, OH

<sup>7</sup>Behavioral Health and Criminal Justice Research Division, RTI International, Research Triangle Park, NC

**Corresponding Author:** Christine E. Kistler, School of Medicine, University of North Carolina, 590 Manning Drive, University of North Carolina at Chapel Hill, Chapel Hill, NC 27599, Christine\_Kistler@med.unc.edu

Office Number: 919.966.0543; Fax: 919.966.6126

**Acknowledgements:** The University of North Carolina at Chapel Hill University Cancer Research Fund at the Lineberger Comprehensive Cancer Center supported this work. The attributes and factors in the experiment were developed with the assistance of the CHAI Core (Communication for Health Applications and Interventions), who is supported by the National Institutes of Health (DK056350); and the National Institutes for Health at the National Cancer Institute (P30 CA16086). We would also like to thank CHAI Core's Maihan Vu (M.V.) and Randall Teal (R.T.) for qualitative coding expertise. We would like to thank Trisha Crutchfield for her project management.

**Author Contributions:** CK, LMR, ELS, KC, MLB, GAZ and AOG all contributed to the conceptualization and design of the survey. CK and KC assisted with data collection. CK,

1  
2  
3  
4  
5  
6  
7  
8  
9  
10  
11  
12  
13  
14  
15  
16  
17  
18  
19  
20  
21  
22  
23  
24  
25  
26  
27  
28  
29  
30  
31  
32  
33  
34  
35  
36  
37  
38  
39  
40  
41  
42  
43  
44  
45  
46  
47  
48  
49  
50  
51  
52  
53  
54  
55  
56  
57  
58  
59  
60

LMR, ELS, KC, CJW, CE, CM, MLB, GAZ and AOG participated in the analysis of the data.

All authors contributed to the content and reviewed the manuscript prior to submission.

For peer review only

1  
2  
3 **ABSTRACT, word count 300**  
4

5  
6 **Objective:** To understand the importance of electronic nicotine delivery systems (ENDS)  
7  
8 product attributes to adult consumers in the United States by age and gender.  
9

10  
11 **Design:** Cross-sectional survey with a discrete choice experiment (best-worst, case 2, scaling) of  
12  
13 19 choice tasks in which participants answered what would make them most want to use and  
14  
15 least want to use an ENDS product.  
16  
17

18  
19 **Setting and Participants:** A national sample of adults (age 18+) in the United States who had  
20  
21 tried an ENDS product at least once.  
22  
23

24  
25 **Measures:** We included nine ENDS attributes with levels that varied across the 19 choice tasks.  
26  
27 We performed a multinomial logistic regression to obtain overall importance scores, attribute-  
28  
29 level part-worth utilities, and most important attribute.  
30  
31

32  
33 **Results:** Of 660 participants, 81% were white, 51% female, and 37% had at least a 4-year  
34  
35 college degree with an average age of 42.0 years (SD ±19.4). The attributes had the following  
36  
37 importance: *Health Effects* 17.6%; *General Effects* 14.1%; *Cessation Aid* 12.6%; *Purchase Price*  
38  
39 12.1%; *Monthly Cost* 12.0%; *Nicotine Content* 11.4%; *Flavor Variety* 8.4%; *Device Traits* 7.2%;  
40  
41 *Modifications* 4.6%. *Health Effects* was the most important attribute for all ages and genders  
42  
43 ( $p < 0.05$ ); variation in other important attributes existed by age, though not gender.  
44  
45

46  
47 **Conclusion:** This study identified the importance of nine ENDS attributes. Perceived *health*  
48  
49 *effects* of ENDS use appeared most important, and *modifications* was least important. Variation  
50  
51 by consumer group existed, which may allow for targeted interventions to modify ENDS use.  
52  
53  
54  
55  
56  
57  
58  
59  
60

1  
2  
3 **Key Words:** electronic nicotine delivery system, e-cigarettes, vaping, importance, attributes,  
4  
5 part-worth utilities, preference  
6  
7

8 **Strengths and Limitations of the Study:**  
9

10  
11 **Article Summary:**  
12

- 13  
14 • Consumers find different attributes of ENDS products important to their use.  
15  
16 • Perceived harms of ENDS use appeared most important to their choice of ENDS  
17  
18 products, and modifiability was least important.  
19  
20 • Variation by consumer group existed, which may allow for targeted interventions to  
21  
22 modify ENDS use.  
23  
24 • Limitations include the convenience sample of United States ENDS users, and the use of  
25  
26 an experimental design as opposed to direct purchasing observations.  
27  
28  
29  
30

31 **Data Sharing: Data can be requested from Christine\_Kistler@med.unc.edu**  
32  
33  
34  
35  
36  
37  
38  
39  
40  
41  
42  
43  
44  
45  
46  
47  
48  
49  
50  
51  
52  
53  
54  
55  
56  
57  
58  
59  
60

## INTRODUCTION, word count=3477

Though its health effects remain unclear, the use of electronic nicotine delivery systems (ENDS) in the United States (U.S.) continues to grow even in the face of impending regulation.<sup>1</sup> While the use of combustible tobacco cigarettes has declined, the U.S. ENDS market now exceeds \$8 billion.<sup>2 3</sup> The rise in the use of ENDS has occurred despite mixed evidence about its harm reduction effects or use as a tobacco cessation aid.<sup>4</sup> Given the uncertainty around ENDS, initial regulations were piece-meal and varied from state to state. However, in 2016, the Food and Drug Administration (FDA) issued a regulation deeming ENDS to fall under its authority.<sup>5</sup> These regulations will impose a variety of restrictions on ENDS manufacturing, sales, and marketing. Notably, however, the FDA has postponed implementation of some of the rule's requirements, citing the possibility that ENDS have the "potential to make a notable public health difference."<sup>6</sup> As the potential benefits and harms of ENDS become clear, regulators and public health groups will need to understand how their proposed regulations will likely affect consumers' use. Consumers use ENDS due to a variety of product attributes that may be amenable to regulation or public health campaigns.<sup>7</sup> Regulators and public health groups need to know the incremental role of individual product attributes on the decision to use ENDS products so that they can make evidence-based policies depending on how they want to modify ENDS use.

A widely-used method in behavioral economics to understand consumer use is through discrete choice experiments (DCE).<sup>8 9</sup> Once the relationship between consumers' use and product attributes is understood, regulators can consider whether and how to address the attributes most important to the most consumers to either increase or decrease product use. While DCEs have been conducted to examine consumers' attitudes towards combustible tobacco regulations and smoking cessation,<sup>10-14</sup> only one has examined potential ENDS use.<sup>15</sup> This recently published



1  
2  
3 study conducted in Canada examined only four ENDS attributes: flavor, nicotine content, health  
4 warnings and price;<sup>15</sup> finding that health risks and efficacy as a tobacco cessation aid were the  
5 two most important attributes to consumers. However, this study only examined four attributes  
6 and included non-smokers and non-ENDS users.  
7  
8  
9  
10

11  
12 Knowledge from our formative qualitative work was used to create a DCE with a larger number  
13 of attributes, focused on ENDS users. We examined the list of a dozen attributes important to  
14 consumers we developed from a recent structured content analysis.<sup>16</sup> Among these twelve  
15 attributes, we found nine attributes that appeared related to the ENDS device itself.<sup>16</sup> We chose  
16 to look at the device-related attributes because these attributes may be more easily regulated than  
17 other psycho-social attributes such as the ability to vape in public or as a social outlet.<sup>17 18</sup> We  
18 designed and fielded a DCE study using a best-worst scaling experiment, among a national U.S.  
19 sample of ENDS users.  
20  
21  
22  
23  
24  
25  
26  
27  
28  
29  
30

## 31 **METHODS**

### 32 **Study Design and Participant Involvement**

33  
34  
35 We conducted a one-time survey of the importance of ENDS product attributes. The attributes  
36 used in the DCE were developed through focus groups.<sup>19</sup> The study involved participants in a  
37 pre-test phase using an academic mass email system. Twelve individuals pretested the survey  
38 between May 9<sup>th</sup> and May 14<sup>th</sup>, 2016. Incentive for completing the survey included possibly  
39 receiving 1 of 4 gift cards valued at \$50 each. Feedback from the pretest led to both condensing  
40 and simplifying the language of the survey. Clarity of the survey was again improved after  
41 another round of testing with 75 survey panelists recruited from Research Now, a research  
42 survey company, between August 15<sup>th</sup> and 16<sup>th</sup>, 2016. The second episode of testing also led to  
43  
44  
45  
46  
47  
48  
49  
50  
51  
52  
53  
54  
55  
56  
57  
58  
59  
60

1  
2  
3 language alterations surrounding questions on the flavor attribute and its levels. The final version  
4  
5 of the survey was fielded using the survey panel between August 26<sup>th</sup> and August 31<sup>st</sup>, 2016.

6  
7  
8 Participants were remunerated from Research Now, in accordance with their usual rate. The  
9  
10 institutional review board at the University of North Carolina at Chapel Hill approved this study.

### 11 12 13 **Participants**

14  
15  
16 We recruited 660 members of the Research Now survey panel aged 18 and older who reported  
17  
18 having used ENDS at least once in their lifetime to complete the ENDS survey. Research Now is  
19  
20 one of the major online survey panel companies with over 140 million finished surveys annually.  
21  
22 Participants had to live in the United States and be able to complete an electronic survey in  
23  
24 English. We specifically oversampled for older adults and minimum quotas to ensure near equal  
25  
26 balance of gender.  
27  
28

### 29 30 31 **Survey Design**

32  
33 The survey was designed to include a best-worst scaling experiment related to ENDS use  
34  
35 followed by a series of tobacco and ENDS-related questions. The survey included nineteen best-  
36  
37 worst scaling choice tasks, followed by questions on each participant's demographics,  
38  
39 personality, current and past use of ENDS and tobacco products, and prior attempts to quit  
40  
41 tobacco use. Sawtooth Software was used to design the survey. Prior to the best-worst tasks, the  
42  
43 survey provided an explanation for each of the attributes, as well as an example task involving  
44  
45 car attribute preference followed by an example of a best-worst scaling task (Figure 1). [Insert  
46  
47 Figure 1] The participants were told that some of the attributes were real but others were not and  
48  
49 were asked, for the purposes of the study, to pretend they were all real, and imagine each choice  
50  
51 task as a new device. As opposed to other types of DCE methods where consumers choose  
52  
53  
54  
55  
56  
57  
58  
59  
60

1  
2  
3 between ENDS products, for each of the nineteen choice tasks, participants selected one of five  
4 listed attribute levels that they felt most likely to encourage and least likely to encourage their  
5 use of a theoretical ENDS product. While other approaches such as a classical DCE would also  
6 yield importance scores, past studies demonstrated user fatigue and attribute dominance due to  
7 complex and overwhelming survey questions, whereas best-worst scaling, though not case 2, has  
8 been used in other areas of tobacco control.<sup>20-23</sup> Additionally, best-worst scaling case 2  
9 methodology was preferred because it leads to scores on a common scale, permitting direct  
10 comparison between all attribute levels within the study, not just direct comparisons among  
11 levels within the same attribute (as is the case for other DCE methods).<sup>24 25</sup> The 660 participants  
12 received 1 of 50 versions of the survey- using a partial profile design. Overall, each attribute  
13 level was seen about 3 times per participant (2.97), and each valid cross-attribute pair was seen  
14 not quite half the time by each participant (0.42 times). Reliable best-worst utilities can be  
15 obtained as long as each participant sees each level about 3 times.<sup>26</sup> The order of attributes  
16 varied across the survey blocks so that positional balance was maintained.

### Best-worst Scaling Attributes and Levels

The nine attributes were included with a definition in the survey. They were:

1. Health effects of e-cigarettes use: This is how much the device affects your health, specifically, the harms to your body as compared to tobacco cigarettes. Imagine these harms are things like cancer, lung diseases, circulation problems, heart attacks, and strokes. These options range from less harmful to your body than tobacco cigarettes to more harmful.

## ENDS Best-Worst Scaling

- 1  
2  
3 2. General Effects of E-Cigarette Use: This is how an e-cigarette affects you overall after  
4 you use it. Options include that it helps you breathe easier and your clothes do not smell  
5 like tobacco to it does not help you breathe easier and your clothes do smell like tobacco.  
6  
7  
8  
9
- 10 3. Quitting Tobacco: This is how much the device can help a person quit using tobacco. It  
11 can range from helping 7 out of 10 people quit smoking to not helping a person quit at  
12 all.  
13  
14  
15
- 16 4. Purchase Price of the Device: This is how much a person can expect to spend when  
17 starting to use the product, including the device and any other necessary pieces. The costs  
18 range from \$5 to \$175.  
19  
20  
21  
22  
23
- 24 5. Monthly Cost of Use: This is how much a person can expect to spend each month with  
25 routine use of an e-cigarette. The costs range from \$5 to \$100 per month to use.  
26  
27  
28
- 29 6. Nicotine Content: This is how much nicotine is available to use in the electronic vapor  
30 product. Choices range from high levels to none.  
31  
32
- 33 7. Flavor Variety: This is how many different types of e-juice flavors that the e-cigarette is  
34 available in. E-juice flavors may be one of the following, flavorless/unflavored; tobacco  
35 or menthol flavors, or many other flavors such as fruit, candy, coffee, and others.  
36  
37  
38  
39
- 40 8. Device Traits: This is how a device looks and feels as you use it, including the feel of  
41 inhaling the device, holding the device, its appearance, and other traits. These options  
42 range from a user experience much like a tobacco cigarette to a user experience very  
43 different from a tobacco cigarette.  
44  
45  
46  
47  
48
- 49 9. Modifications: Some e-cigarettes can be modified. This is how much you can alter the e-  
50 cigarette to meet your needs. This doesn't include refilling or replacing an e-juice  
51  
52  
53  
54  
55  
56  
57  
58  
59  
60

1  
2  
3 cartridge. Choices include being able to modify the device and not being able to modify  
4  
5 the device.  
6  
7

8 For the rest of the paper, we will refer to these nine as *health effects, general effects,*  
9  
10 *cessation aid, purchase price, monthly cost, nicotine content, flavor variety, device traits, and*  
11 *modifications*.<sup>16</sup> We chose to divide cost into a separate purchase price and monthly cost  
12  
13 attributes because of the variation that can be seen in each; the focus group members  
14  
15 mentioned the two attributes separately as well. Rates of tobacco cessation for ENDS  
16  
17 products were drawn from the evidence that ENDS are often used as a tobacco cessation aid,  
18  
19 regardless of actual effectiveness. It is worth noting that medications prescribed for assisting  
20  
21 in tobacco cessation (e.g., bupropion, varenicline, nicotine containing products) have only a 2  
22  
23 out of 10 success rate at best.<sup>27</sup>  
24  
25  
26  
27  
28  
29

### 30 **Other Measures**

31  
32 Participants responded to questions about sex, age, race and ethnicity, perceptions of general  
33  
34 health,<sup>28</sup> education level, and yearly household income. The survey then collected details about  
35  
36 each participants' tobacco and ENDS use behaviors. Items included the heaviness of smoking  
37  
38 index, which asks participants "At present, how long after waking do you wait before having  
39  
40 your first cigarette (in mins)?" and "How many cigarettes do you smoke per day at present?"<sup>29</sup>  
41  
42 and other questions from the National Adult Tobacco Survey Questionnaire, 2012-2013, such as  
43  
44 age of first cigarette, number of cigarettes smokes per day, and smoking days per month.<sup>30</sup>  
45  
46  
47  
48

### 49 **Analysis**

50  
51  
52 In DCEs, respondents are given tasks that combine possible varieties of product attributes and  
53  
54 asked to make a choice; in our case, which attribute of the product was important to their use.  
55  
56  
57  
58  
59  
60

1  
2  
3 With enough choice tasks, estimated importance scores can be generated, indicating which  
4 attribute most influenced their choices. The statistical model underlying best-worst scaling  
5  
6 assumes that the relative choice probability of a given pair of best-worst choices is proportional  
7  
8 to the distance between the two attribute levels on the latent utility scale. The pair of attribute  
9  
10 levels chosen maximizes the difference in the part-worth utilities for a given choice task. These  
11  
12 distances between attribute levels are modelled as a difference model, with variations on best-  
13  
14 worst scaling sometimes called “maximum difference scaling”.<sup>31</sup> Using a multinomial regression  
15  
16 model, these differences can provide the part-worth utilities relative to a single attribute level,  
17  
18 rather than relative to the sample mean.<sup>24</sup> Part-worth utilities are zero-centered numerical values  
19  
20 that represent the relative desirability of the levels within each attribute. The higher the number,  
21  
22 the more desirable the attribute’s level is to participants. Importance scores were then calculated,  
23  
24 based on the difference between minimum and maximum part-worth utilities within an  
25  
26 attribute.<sup>25 32</sup> The total importance of all attributes to a decision is 100%, with each attribute a  
27  
28 percentage of that total importance. Most important attribute was determined by comparing the  
29  
30 importance scores for each individual, defining the attribute with the largest importance score as  
31  
32 most important. In order to examine changes in attribute importance by age and gender, we  
33  
34 performed a dependent z-test of proportions to compare the most important attribute to the next  
35  
36 highest ranked attribute by age and gender.  
37  
38  
39  
40  
41  
42  
43  
44

## 45 RESULTS

46  
47  
48 Of 900 individuals surveyed, 660 participants had used ENDS at least one time. Participants had  
49  
50 a mean age of 42 ((SD) ± 19.4), with a range from 18 to 82 years-old, and were evenly split  
51  
52 female versus male (51% v 49%) (Table 1) [insert Table 1]. Most participants were white (81%),  
53  
54 making less than \$60,000 annually (60%), and self-reported very good or excellent health (60%).  
55  
56  
57  
58  
59  
60

Sixty-four percent had used ENDS in the last 30 days. Almost all participants (92%) reported a history of traditional tobacco products and most (85%) had tried to quit tobacco in the past 12 months. Pearson's  $\chi^2$  tests of the relation between age and tobacco use characteristics found statistically significant ( $p < .05$ ) differences between sub-groups of young (18-24), middle-aged (25-49), and older (50+) adults. For example, young adult participants were more likely to have used ENDS in the last 30 days ( $p = .036$ ) and to have used flavored ENDS ( $p = .012$ ). Older adults were less likely to use ENDS ( $p < .001$ ) and more likely to smoke one pack/day of traditional tobacco ( $p < .001$ ) (see table 2).

### **Importance of ENDS attributes overall and by subgroup**

The overall importance scores for the nine attributes are found in Figure 2. [Insert Figure 2] The attributes had the following importance distribution: *Health Effects* 17.6%; *General Effects* 14.1%; *Cessation Aid* 12.6%; *Purchase Price* 12.1%; *Monthly Cost* 12.0%; *Nicotine Content* 11.4%; *Flavor Variety* 8.4%; *Device Traits* 7.2%; *Modifications* 4.6%. Independent t-tests of the importance scores by gender found that when compared with males, female participants were more likely to give importance to *Health Effects* ( $\Delta+9.7\%$ ;  $p < .001$ ) and *General Effects* ( $\Delta+8.1\%$ ;  $p = .002$ ), and less likely to give importance to *Purchase Price* ( $\Delta-8.3\%$ ;  $p = .011$ ) and *Monthly Cost* ( $\Delta-6.8\%$ ;  $p = .008$ ).

Numerous statistically significant differences were found by age sub-groups. Younger adults compared with middle-aged and older adults together were more likely to give importance to *Modifications* ( $\Delta+22\%$ ;  $p = .004$ ) and less likely to give importance to *Purchase Price* ( $\Delta-11\%$ ;  $p = .006$ ). Middle-aged adults compared with young and older adults together were more likely to give importance to *Modifications* ( $\Delta+24\%$ ;  $p = .001$ ) and less likely to give importance to *Health Effects* ( $\Delta-5\%$ ;  $p = .027$ ). Older adults compared with middle-aged and young adults

1  
2  
3 together were more likely to give importance to *Purchase Price* ( $\Delta+11\%$ ;  $p = .004$ ) and less  
4  
5 likely to give importance to *Modifications* ( $\Delta-34\%$ ;  $p < .001$ ).  
6  
7

### 8 **Part-worth utilities of ENDS attribute levels**

9

10  
11 The part-worth utility scores for the levels of the nine attributes are shown in Table 2. [Insert  
12  
13 Table 2] *Health Effects* had the level with the highest part-worth utility of 88.96 (90% CI: 84.79,  
14  
15 93.13), followed by *General Effects* with a level at 58.37 (90% CI: 55.07, 61.68), and *Purchase*  
16  
17 *Price* at 52.41 (90% CI: 49.12, 55.70). *Cessation Aid* had the level with the lowest part-worth  
18  
19 utility of  $-49.11$  (90% CI:  $-52.46$ ,  $-45.75$ ), followed by *Health Effects* at  $-47.27$  (90% CI:  
20  
21  $-49.69$ ,  $-44.86$ ).  
22  
23  
24  
25

### 26 **Most important ENDS attribute overall and by sub-group**

27

28  
29 After examining the importance scores for each individual, *Health Effects* was the most  
30  
31 important attribute for 49% of participants (Table 3). [Insert Table 3] *Nicotine Content* was next  
32  
33 most frequent (13%) and *Purchase Price* was third (12%). A goodness-of-fit  $\chi^2$  test determined  
34  
35 that the nine attributes differed from expected and thus were not equally distributed among  
36  
37 participants ( $p < .001$ ). Also, dependent z-tests of the proportions of the second through ninth  
38  
39 ranked attributes against *Health Effects* found that all were significantly lower ranked and were  
40  
41 less likely to be chosen as most important (Range:  $\Delta-83\%$ - $99\%$ ;  $p < .001$ ). Aside from *Nicotine*  
42  
43 *Content* compared with *Health Effects*, stepped tests of each attribute against its nearest found  
44  
45 that only *Device Traits* ( $p = .005$ ) and *Modifications* ( $p = .020$ ) were statistically significantly  
46  
47 less important.  
48  
49  
50  
51

52  
53 The nine attributes also statistically significantly differed from the expected distribution by the  
54  
55 sub-groups for age and gender ( $p < .001$ ). Pearson's  $\chi^2$  tests of the relation between the age sub-  
56  
57  
58  
59  
60



1  
2  
3 groups and most important attribute found that *General Effects* was the most important attribute  
4  
5 for younger adults as compared to other ages ( $p < .001$ ). Compared to younger and older adults,  
6  
7 *General Effects* was less likely to be the most important attribute for middle aged adults ( $p = .029$ )  
8  
9 and *Flavor Variety* was more likely to be most important ( $p = .018$ ). Compared to both younger  
10  
11 and middle-aged adults, *Health Effects* was more likely to be most important ( $p = .016$ ) and *Flavor*  
12  
13 *Variety* less likely ( $p = .003$ ). There were no statistically significant differences in the distribution  
14  
15 of most important attributes by gender though *Health Effects* ( $p = .061$ ) and *Cessation Aid* ( $p =$   
16  
17  $.075$ ) approached significance.  
18  
19  
20

## 21 DISCUSSION

22  
23 In our study of US adult ENDS consumers, we found that *Health Effects* had the highest  
24  
25 importance to consumers' choice of an ENDS product. Other than cost (i.e., *Purchase Price* and  
26  
27 *Monthly Cost*), the attributes with the highest importance scores hinged on consumers'  
28  
29 perceptions of efficacy as a harm reduction strategy (*Health Effects*), health benefit (*General*  
30  
31 *Effects*), and tobacco cessation (*Cessation Aid*), respectively. Consumers of different ages varied  
32  
33 in importance they placed on different ENDS product characteristics. As more evidence about  
34  
35 these products' ability to benefit or harm consumers is more fully understood, public health  
36  
37 initiatives could target these perceptions. Variation by consumer group existed, which may allow  
38  
39 for targeted interventions to reduce or enhance ENDS use in any given consumer group.  
40  
41  
42  
43  
44

45  
46 ENDS products are marketed as healthier than combustible tobacco products,<sup>33</sup> but the evidence  
47  
48 regarding the impact of ENDS products on human health is slowly emerging. National  
49  
50 Academies of Science, Engineering, and Medicine recently released a report on the public health  
51  
52 consequences of ENDS products.<sup>34</sup> While there is substantial evidence that, except for nicotine,  
53  
54 exposure to potentially toxic substances from ENDS is significantly lower compared with  
55  
56  
57  
58  
59

1  
2  
3 combustible tobacco products, there is also substantial evidence that exposure to ENDS aerosols  
4  
5 can induce lung dysfunction and oxidative stress in human tissue.<sup>35</sup> The long-term effects on  
6  
7 cardiovascular outcomes, cancer or other health conditions are unclear. Our work should add a  
8  
9 sense of urgency to the push for ongoing research into the evidence for and against ENDS  
10  
11 products as a harm reduction strategy. The idea that an ENDS product was less harmful than  
12  
13 tobacco cigarettes was extremely important to participants' choice. The level, that the product  
14  
15 was "less harmful on my body as compared to tobacco cigarettes", had the highest part-worth  
16  
17 utility of any attribute (88.96). Moreover, the level that the product "had the same amount of  
18  
19 harm on my body as compared to tobacco cigarettes" caused people to avoid choosing that  
20  
21 product and had a negative utility (-22.45). Both the *Health Effects* and the use as a *Cessation*  
22  
23 *Aid* had levels that are likely healthier and of more help in cessation than the evidence suggests.  
24  
25 Yet in general, perceptions, including misperceptions, affect smokers' behavior.<sup>36</sup> The look and  
26  
27 feel of cigarette packaging appears to influence consumers' use and may affect their perceptions'  
28  
29 of the healthiness and harm of the cigarettes within.<sup>37</sup> A study of combustible tobacco labeling  
30  
31 revealed that "additive-free" or "natural" labels on current cigarette brands were misperceived to  
32  
33 be possibly less harmful than other brands of cigarettes and may reduce the efficacy of public  
34  
35 health initiatives.<sup>38</sup> Even efforts by the Federal Trade Commission to prohibit language that  
36  
37 might create misperceptions of reduced harm in tobacco cigarettes has been unsuccessful.<sup>36</sup> This  
38  
39 (mis)perception of harm and health appears to strongly influence the choice of ENDS products.  
40  
41 Further efforts, including those studying clear labeling and health warnings, are needed to  
42  
43 explore how to align ENDS users' perceptions of ENDS products with the evidence.  
44  
45  
46  
47  
48  
49  
50

51  
52 While *Health Effects* had the highest importance score, the combined importance of *Purchase*  
53  
54 *Price* and *Monthly Cost* was greater than *Health Effects*, so the importance of financial burden on  
55  
56  
57  
58  
59  
60

1  
2  
3 ENDS use should not be underestimated. If we combine the two cost-related attributes, *Purchase*  
4 *Price* and *Monthly Cost*, overall cost's importance score would be 24.1% as compared to 17.6%  
5  
6 for *Health Effects*. A recent study of the cross-price elasticity of ENDS and tobacco cigarettes  
7  
8 found that ENDS are partially substitutable for cigarettes.<sup>39</sup> However, the availability of ENDS  
9  
10 also reduced the number who reported they would quit smoking if cigarette costs increased by  
11  
12 20% (50.2% to 30.0%), revealing that ENDS may discourage smokers from quitting  
13  
14 completely.<sup>40</sup> Additionally, increases in the cost of ENDS products may shift consumers back  
15  
16 towards combustible tobacco, though recent simulations found no relationship between cigarette  
17  
18 prices and ENDS use.<sup>41</sup> Taxation may reduce ENDS use but further work is needed to model the  
19  
20 consequences of price increases on ENDS use.  
21  
22  
23  
24  
25

26  
27 Potentially meaningful differences were found in the importance of ENDS product attributes and  
28  
29 the most important attribute by different age groups. Younger and middle-aged adults found  
30  
31 *Modifications* to be more important than older adults. While we did not see gender differences  
32  
33 for attribute preferences, a Canadian DCE study of young women found that pack structure was  
34  
35 the most important attribute driving ENDS use.<sup>14</sup> The shape and structure of the device and  
36  
37 packaging may be more important to a younger population. Younger adults were more likely to  
38  
39 have *General Effects* as their most important attribute while *Flavor Variety* was more likely to be  
40  
41 most important to middle-aged adults and significantly less likely to be most important to older  
42  
43 adults. A systematic review of studies of consumers' preference for flavor found flavor to be  
44  
45 likely important to young people.<sup>7</sup> However, as with our own qualitative study, which was  
46  
47 included in the review, many of the included studies did not have experimental designs.<sup>16</sup>  
48  
49  
50 Interestingly, another Canadian DCE study of ENDS use found that younger smokers perceived  
51  
52 cherry flavor as less harmful while older adults found tobacco flavor less harmful.<sup>15</sup> While we  
53  
54  
55  
56  
57  
58  
59  
60

1  
2  
3 found *Flavor Availability* was more important to middle-aged adults, we did not find older adults  
4  
5 favored tobacco flavoring. However, both of these studies found that attributes related to the  
6  
7 users' health (*health effects* in our case and health warnings in the Canadian study) were more  
8  
9 important than flavor, and thus efforts to regulate flavors may not reduce ENDS use as much as  
10  
11 other regulations on other attributes, such as health effects.  
12  
13

14  
15 Our study has several important limitations. First, our study examines choice behavior and not  
16  
17 actual purchase behavior. While we drew from a national online survey panel, our respondent  
18  
19 population is limited to a convenience sample. Additionally, best-worst scaling can be subject to  
20  
21 attribute non-attendance, where participants either fail to pay attention to an attribute or  
22  
23 attributes, or attribute dominance, where participants only pay attention to a single attribute. We  
24  
25 found that only about 2% of participants did not attend to the majority of attributes, though about  
26  
27 16% failed to attend to at least one attribute. No participant showed dominance behavior. While  
28  
29 there was some attribute non-attendance, best-worst scaling inclines participants to make  
30  
31 judgements about more attributes and does not invite as much attribute non-attendance or  
32  
33 dominance as can be seen in other standard DCEs. However, it seems more likely that socially  
34  
35 desirable responses could bias respondents' choices within best-worst scaling than other DCEs  
36  
37 might.<sup>24</sup>  
38  
39  
40  
41  
42

## 43 CONCLUSION

44  
45  
46 A variety of ENDS product attributes are important to consumers. *Health Effects* had the highest  
47  
48 importance to consumers' choice of an ENDS product. Other than cost, the attributes with the  
49  
50 highest importance scores hinged on consumers' perceptions of efficacy as a harm reduction  
51  
52 strategy (*Health Effects*), general benefit (*General Effects*), and tobacco cessation (*Cessation*  
53  
54 *Aid*), respectively. Consumers differed by age group in some of the more important attributes.  
55  
56  
57  
58  
59  
60

1  
2  
3        Though the overall importance of ENDS product attributes was similar, efforts to increase or  
4  
5        decrease ENDS use could be tailored to these group differences.  
6  
7  
8  
9

## 10 11        **ACKNOWLEDGEMENTS** 12

13  
14        The work reported in this paper was conducted by CHAI Core (Communication for Health  
15        Applications and Interventions), who is supported in part by a grant from NIH (DK056350) to  
16        the University of North Carolina Nutrition Obesity Research Center and from NCI (P30-  
17        CA16086) to the UNC Lineberger Comprehensive Cancer Center.  
18  
19  
20  
21  
22  
23  
24  
25  
26  
27  
28  
29  
30  
31  
32  
33  
34  
35  
36  
37  
38  
39  
40  
41  
42  
43  
44  
45  
46  
47  
48  
49  
50  
51  
52  
53  
54  
55  
56  
57  
58  
59  
60

## REFERENCES

1. Pauly J, Li Q, Barry MB. Tobacco-free electronic cigarettes and cigars deliver nicotine and generate concern. *Tob Control* 2007;16(5):357-57. doi: 10.1136/tc.2006.019687
2. Jamal A, Phillips E, Gentzke AS, et al. Current Cigarette Smoking Among Adults - United States, 2016. *MMWR Morb Mortal Wkly Rep* 2018;67(2):53-59. doi: 10.15585/mmwr.mm6702a1
3. MacGuill S. What Is The New Tobacco Data Telling Us: Euromonitor International; 2017 [updated June 20, 2016. Available from: <https://blog.euromonitor.com/2016/06/what-is-the-new-tobacco-data-telling-us.html> accessed January 21, 2018.
4. Callahan-Lyon P. Electronic cigarettes: human health effects. *Tob Control* 2014;23(Suppl 2):ii36-ii40. doi: 10.1136/tobaccocontrol-2013-051470
5. Backinger CL, Meissner HI, Ashley DL. The FDA "Deeming Rule" and Tobacco Regulatory Research. *Tobacco regulatory science* 2016;2(3):290-93. doi: 10.18001/TRS.2.3.8
6. Administration USFaD. FDA's Plan for Tobacco and Nicotine Regulation.
7. Zare S, Nemati M, Zheng Y. A systematic review of consumer preference for e-cigarette attributes: Flavor, nicotine strength, and type. *PLoS One* 2018;13(3):e0194145. doi: 10.1371/journal.pone.0194145
8. de Bekker-Grob EW, Hol L, Donkers B, et al. Labeled versus unlabeled discrete choice experiments in health economics: an application to colorectal cancer screening. *Value Health* 2010;13(2):315-23. doi: 10.1111/j.1524-4733.2009.00670.x [published Online First: 2009/11/17]
9. Bech-Larsen T, Nielsen NA. A comparison of five elicitation techniques for elicitation of attributes of low involvement products. *Journal of Economic Psychology* 1999;20(3):315-41. doi: [http://dx.doi.org/10.1016/S0167-4870\(99\)00011-2](http://dx.doi.org/10.1016/S0167-4870(99)00011-2)
10. Marti J. Assessing preferences for improved smoking cessation medications: a discrete choice experiment. *Eur J Health Econ* 2012;13(5):533-48. doi: 10.1007/s10198-011-0333-z
11. Marti J. A best-worst scaling survey of adolescents' level of concern for health and non-health consequences of smoking. *Soc Sci Med* 2012;75(1):87-97. doi: 10.1016/j.socscimed.2012.02.024
12. Goto R, Takahashi Y, Ida T. Changes in smokers' attitudes toward intended cessation attempts in Japan. *Value Health* 2011;14(5):785-91. doi: 10.1016/j.jval.2010.12.010
13. Goto R, Nishimura S, Ida T. Discrete choice experiment of smoking cessation behaviour in Japan. *Tob Control* 2007;16(5):336-43. doi: 10.1136/tc.2006.019281
14. Kotnowski K, Fong GT, Gallopel-Morvan K, et al. The Impact of Cigarette Packaging Design Among Young Females in Canada: Findings From a Discrete Choice Experiment. *Nicotine & Tobacco Research* 2015 doi: 10.1093/ntr/ntv114
15. Czoli CD, Goniewicz M, Islam T, et al. Consumer preferences for electronic cigarettes: results from a discrete choice experiment. *Tob Control* 2015 doi: 10.1136/tobaccocontrol-2015-052422
16. Kistler CE, Crutchfield TM, Sutfin EL, et al. Consumers' Preferences for Electronic Nicotine Delivery System Product Features: A Structured Content Analysis. *International Journal of Environmental Research and Public Health* 2017;14(6):613. doi: 10.3390/ijerph14060613
17. Hoek J, Thrul J, Ling P. Qualitative analysis of young adult ENDS users' expectations and experiences. *BMJ Open* 2017;7(3)
18. Keane H, Weier M, Fraser D, et al. 'Anytime, anywhere': vaping as social practice. *Critical Public Health* 2017;27(4):465-76. doi: 10.1080/09581596.2016.1250867
19. Kistler CE, Crutchfield TM, Sutfin EL, et al. Consumers' Preferences for Electronic Nicotine Delivery System Product Features: A Structured Content Analysis. *Int J Environ Res Public Health* 2017;14(6) doi: 10.3390/ijerph14060613

20. Mühlbacher AC, Kaczynski A, Zweifel P, et al. Experimental measurement of preferences in health and healthcare using best-worst scaling: an overview. *Health Economics Review* 2016;6:2. doi: 10.1186/s13561-015-0079-x
21. Gendall P, Eckert C, Hoek J, et al. Estimating the effects of novel on-pack warnings on young adult smokers and susceptible non-smokers. *Tob Control* 2018;27(5):519-25. doi: 10.1136/tobaccocontrol-2017-053719
22. Hoek J, Gendall P, Eckert C, et al. Dissuasive cigarette sticks: the next step in standardised ('plain') packaging? *Tob Control* 2016;25(6):699-705. doi: 10.1136/tobaccocontrol-2015-052533
23. Hoek J, Gendall P, Eckert C, et al. Effects of brand variants on smokers' choice behaviours and risk perceptions. *Tob Control* 2016;25(2):160-5. doi: 10.1136/tobaccocontrol-2014-052094
24. Orme B. The MaxDiff System Technical Paper. *Technical Paper Series* 2013. <https://www.sawtoothsoftware.com/download/techpap/maxdifftech.pdf> (accessed February 8, 2018).
25. Louviere JJ, Flynn TN. Using Best-Worst Scaling Choice Experiments to Measure Public Perceptions and Preferences for Healthcare Reform in Australia. *Patient* 2010;3(4):275-83. doi: <http://dx.doi.org/10.2165/11539660-000000000-00000>
26. Orme B. Accuracy of HB Estimation in MaxDiff Experiments. Sawtooth Software: Research Paper Series. Sequim, WA: Sawtooth Software, Inc, 2005.
27. West R, Raw M, McNeill A, et al. Health-care interventions to promote and assist tobacco cessation: a review of efficacy, effectiveness and affordability for use in national guideline development. *Addiction (Abingdon, England)* 2015;110(9):1388-403. doi: 10.1111/add.12998
28. Cunny KA, Matthew Perri I. Single-Item Vs Multiple-Item Measures of Health-Related Quality of Life. *Psychol Rep* 1991;69(1):127-30. doi: 10.2466/pr0.1991.69.1.127
29. Heatherton TF, Kozlowski LT, Frecker RC, et al. Measuring the Heaviness of Smoking: using self-reported time to the first cigarette of the day and number of cigarettes smoked per day. *Br J Addict* 1989;84(7):791-99.
30. Prevention CfDca. National Adult Tobacco Survey Questionnaire, 2012–2013. 2014
31. Szeinbach SL, Barnes JH, McGhan WF, et al. Using conjoint analysis to evaluate health state preferences. *Drug Inf J* 1999;33(3):849.
32. Flynn TN, Louviere JJ, Peters TJ, et al. Best–worst scaling: What it can do for health care research and how to do it. *J Health Econ* 2007;26(1):171-89. doi: <http://dx.doi.org/10.1016/j.jhealeco.2006.04.002>
33. Zhu S-H, Sun JY, Bonnevie E, et al. Four hundred and sixty brands of e-cigarettes and counting: implications for product regulation. *Tob Control* 2014;23(Suppl 3):iii3-iii9. doi: 10.1136/tobaccocontrol-2014-051670
34. National Academies of Sciences E, and Medicine. Public Health Consequences of E-Cigarettes. Washington, DC: The National Academies Press 2018.
35. Carnevale R, Sciarretta S, Violi F, et al. Acute Impact of Tobacco vs Electronic Cigarette Smoking on Oxidative Stress and Vascular Function. *Chest* 2016;150(3):606-12. doi: <https://doi.org/10.1016/j.chest.2016.04.012>
36. Yong H-H, Borland R, Cummings KM, et al. US Smokers' Beliefs, Experiences and Perceptions of Different Cigarette Variants Before and After the FSPTCA Ban on Misleading Descriptors Such as "Light," "Mild," or "Low". *Nicotine & Tobacco Research* 2016;18(11):2115-23. doi: 10.1093/ntr/ntw107
37. McNeill A, Gravely S, Hitchman SC, et al. Tobacco packaging design for reducing tobacco use. 2017 doi: 10.1002/14651858.CD011244.pub2

## ENDS Best-Worst Scaling

38. Leas EC, Ayers JW, Strong DR, et al. Which cigarettes do Americans think are safer? A population-based analysis with wave 1 of the PATH study. *Tob Control* 2017;26(E1):e59-e60. doi: 10.1136/tobaccocontrol-2016-053334

Table 1. Participants' Demographic Characteristics, N (%)

| Characteristics                                                           | Total, N=660 | Age 18-24,<br>N=169 | Age 25-49,<br>N=242 | Age 50+,<br>N= 249 |
|---------------------------------------------------------------------------|--------------|---------------------|---------------------|--------------------|
| Age, mean (SD)                                                            | 42.0 (19.4)  | 22.2 (1.6)          | 32.1 (7.7)          | 65.0 (6.9)         |
| Female                                                                    | 334 (51%)    | 90 (53%)            | 120 (49%)           | 124 (50%)          |
| Race                                                                      |              |                     |                     |                    |
| White                                                                     | 532 (81%)    | 113 (67%)           | 191 (79%)           | 228 (92%)          |
| Black                                                                     | 42 (6%)      | 14 (8%)             | 18 (7%)             | 10 (4%)            |
| Asian-American                                                            | 40 (6%)      | 20 (12%)            | 18 (7%)             | 2 (1%)             |
| Other                                                                     | 46 (7%)      | 22 (13%)            | 15 (6%)             | 9 (4%)             |
| Hispanic or Latino/Latina                                                 | 94 (14%)     | 42 (25%)            | 45 (19%)            | 7 (3%)             |
| College degree or higher                                                  | 247 (37%)    | 37 (22%)            | 113 (47%)           | 97 (38%)           |
| Overall Health, very good or excellent                                    | 396 (60%)    | 110 (65%)           | 160 (66%)           | 126 (51%)          |
| Annual Household Income,                                                  |              |                     |                     |                    |
| \$0 to \$29,999                                                           | 149 (23%)    | 52 (31%)            | 51 (21%)            | 46 (18%)           |
| \$30,000 to \$59,999                                                      | 247 (37%)    | 75 (44%)            | 85 (35%)            | 87 (35%)           |
| \$60,000 to \$89,999                                                      | 156 (24%)    | 25 (15%)            | 73 (30%)            | 58 (23%)           |
| \$90,000 or more                                                          | 106 (16%)    | 17 (10%)            | 33 (14%)            | 58 (23%)           |
| Knowledge that quitting smoking with help is more successful than without | 310 (47%)    | 75 (44%)            | 108 (45%)           | 127 (51%)          |
| Used ENDS in last 30 days <sup>1</sup>                                    | 387 (64%)    | 109 (71%)           | 153 (69%)*          | 125 (54%)*         |
| Used flavored ENDS in last 30 days, of current ENDS users <sup>2</sup>    | 296 (70%)    | 93 (79%)*           | 134 (79%)*          | 69 (52%)*          |
| Anticipates ENDS use in next year                                         | 478 (72%)    | 121 (72%)           | 193 (80%)*          | 164 (66%)*         |
| Ever used traditional tobacco products                                    | 607 (92%)    | 154 (91%)           | 221 (91%)           | 232 (93%)          |
| Age at first cigarette, mean (SD) <sup>1</sup>                            | 17 (6)       | 16 (3)              | 18 (5)              | 18 (8)             |

39. Quisenberry AJ, Koffarnus MN, Hatz LE, et al. The Experimental Tobacco Marketplace I: Substitutability as a Function of the Price of Conventional Cigarettes. *Nicotine & Tobacco Research* 2015 doi: 10.1093/ntr/ntv230
40. Grace RC, Kivell BM, Laugesen M. Estimating Cross-Price Elasticity of E-Cigarettes Using a Simulated Demand Procedure. *Nicotine & Tobacco Research* 2015;17(5):592-98. doi: 10.1093/ntr/ntu268
41. Huang J, Tauras J, Chaloupka FJ. The impact of price and tobacco control policies on the demand for electronic nicotine delivery systems. *Tob Control* 2014;23(Suppl 3):iii41-iii47. doi: 10.1136/tobaccocontrol-2013-051515



## ENDS Best-Worst Scaling

|                                                      |           |           |           |            |
|------------------------------------------------------|-----------|-----------|-----------|------------|
| Smokes more than 1 pack/day <sup>3</sup>             | 54 (12%)  | 3 (3%)*   | 12 (8%)*  | 39 (23%)*  |
| First smoke within 30 minutes of waking <sup>3</sup> | 256 (59%) | 48 (44%)* | 89 (59%)  | 119 (70%)* |
| Tobacco quit attempt in past 12 months <sup>3</sup>  | 369 (85%) | 87 (79%)* | 130 (85%) | 152 (89%)  |

Note. \*  $p < .05$ ; Test versus total. <sup>1</sup> n=607, 154, 221, and 232, respectively; <sup>2</sup> n=420, 117, 170, and 133, respectively; <sup>3</sup> n=432, 110, 152, and 170, respectively.

Table 2. Final ENDS attributes, levels, and mean utilities, n=660

| ENDS Attributes        | Levels of ENDS Attributes                                                     | Part-worth Utilities, Mean (95% CI) |
|------------------------|-------------------------------------------------------------------------------|-------------------------------------|
| Harms of Use           | Less harmful on my body as compared to tobacco cigarettes                     | 88.96 (84.79, 93.13)                |
|                        | Unknown harm on my body as compared to tobacco cigarettes                     | -19.24 (-21.32, -17.17)             |
|                        | Same amount of harm on my body as compared to tobacco cigarettes              | -22.45 (-24.90, -19.99)             |
|                        | More harmful on my body as compare to tobacco cigarettes                      | -47.27 (-49.69, -44.86)             |
| General Effects of Use | Helps me breathe easier AND my clothes don't smell like tobacco               | 58.37 (55.07, 61.68)                |
|                        | Helps me breathe easier, BUT my clothes smell like tobacco                    | -3.50 (-5.78, -1.22)                |
|                        | Does not help me breathe easier, BUT my clothes don't smell like tobacco      | -12.35 (-14.78, -9.93)              |
|                        | Does not help me breathe easier BUT still makes my clothes smell like tobacco | -42.52 (-45.15, -39.89)             |
| Tobacco Cessation      | 7 of 10 people are able to quit tobacco cigarettes                            | 41.92 (39.36, 44.47)                |
|                        | 5 of 10 people are able to quit tobacco cigarettes                            | 19.98 (18.20, 21.76)                |

## ENDS Best-Worst Scaling

|                           |                                                                                |                         |
|---------------------------|--------------------------------------------------------------------------------|-------------------------|
|                           | 2 of 10 people are able to quit tobacco cigarettes                             | -12.79 (-14.84, -10.73) |
|                           | People are not able to quit smoking tobacco cigarettes                         | -49.11 (-52.46, -45.75) |
| Purchase Price of Product | \$5 one-time purchase                                                          | 52.41 (49.12, 55.70)    |
|                           | \$55 one-time purchase                                                         | 12.40 (11.02, 13.77)    |
|                           | \$115 one-time purchase                                                        | -26.04 (-27.92, -24.17) |
|                           | \$175 one-time purchase                                                        | -38.76 (-40.95, -36.57) |
| Monthly Cost of Use       | \$5 per month to use                                                           | 47.50 (44.72, 50.29)    |
|                           | \$25 per month to use                                                          | 16.68 (15.00, 18.37)    |
|                           | \$65 per month to use                                                          | -22.16 (-23.91, -20.42) |
|                           | \$100 per month to use                                                         | -42.03 (-44.37, -39.68) |
| Nicotine Content          | None (0 mg/ml)                                                                 | 10.89 (6.83, 14.96)     |
|                           | Low (6 mg/ml)                                                                  | 18.29 (16.16, 20.41)    |
|                           | Medium (12 mg/ml)                                                              | 2.11 (-0.01, 4.23)      |
|                           | High (24 mg/ml)                                                                | -31.30 (-35.12, -27.47) |
| Flavor Availability       | Available in fruit, candy, coffee, wine and other flavors                      | 15.88 (13.32, 18.44)    |
|                           | Available in tobacco and menthol flavors                                       | 13.50 (11.94, 15.05)    |
|                           | Available without any flavoring                                                | -29.38 (-32.27, -26.48) |
| Device Design             | Very similar in size, weight, appearance, and feel to a tobacco cigarette      | 12.85 (11.16, 14.54)    |
|                           | Somewhat similar in size, weight, appearance, and feel to a tobacco cigarette  | 14.47 (12.87, 16.07)    |
|                           | Not similar at all in size, weight, appearance and feel to a tobacco cigarette | -27.32 (-29.98, -24.66) |
| Modifiability             | Various parts can be modified                                                  | 12.46 (10.68, 14.23)    |
|                           | It cannot be modified                                                          | -12.46 (-14.23, -10.68) |

**Table 3. Most Important Attribute, n (%)**

| <b>ENDS Characteristics</b> | <b>Total<br/>N=660</b> | <b>Age 18-24<br/>N=169</b> | <b>Age 25-49<br/>N=242</b> | <b>Age 50+<br/>N=249</b> | <b>Male<br/>N=326</b> | <b>Female<br/>N=334</b> |
|-----------------------------|------------------------|----------------------------|----------------------------|--------------------------|-----------------------|-------------------------|
| Harms of Use                | 326 (49%)              | 74 (44%)                   | 114 (47%)                  | 138 (55%) <sup>a</sup>   | 149 (46%)             | 177 (53%)               |
| Nicotine Content            | 85 (13%)*              | 26 (15%)                   | 32 (13%)                   | 27 (11%)                 | 42 (13%)              | 43 (13%)                |
| Purchase Price of Product   | 77 (12%)               | 14 (8%)                    | 30 (12%)                   | 33 (13%)                 | 42 (13%)              | 35 (10%)                |
| General Effects of Use      | 56 (9%)                | 26 (15%) <sup>a</sup>      | 13 (5%) <sup>a</sup>       | 17 (7%)                  | 24 (7%)               | 32 (10%)                |
| Tobacco Cessation Aid       | 45 (7%)                | 11 (6%)                    | 16 (7%)                    | 18 (7%)                  | 28 (9%)               | 17 (5%)                 |
| Flavor Availability         | 32 (5%)                | 10 (6%)                    | 18 (7%) <sup>a</sup>       | 4 (2%) <sup>a</sup>      | 18 (5%)               | 14 (4%)                 |
| Monthly Cost of Use         | 27 (4%)                | 7 (4%)                     | 11 (5%)                    | 9 (4%)                   | 17 (5%)               | 10 (3%)                 |
| Device Design               | 10 (2%)*               | 1 (1%)                     | 6 (2%)                     | 3 (1%)                   | 6 (2%)                | 4 (1%)                  |
| Modifiability               | 2 (0%)*                | 0 (0%)                     | 2 (1%)                     | 0 (0%)                   | 0 (0%)                | 2 (1%)                  |

Note. \*  $p < .05$  versus next higher ranked attribute for total sample. <sup>a</sup>  $p < .05$  versus total sample for age groups.

1  
2  
3  
4  
5  
6  
7  
8  
9  
10  
11  
12  
13  
14  
15  
16  
17  
18  
19  
20  
21  
22  
23  
24  
25  
26  
27  
28  
29  
30  
31  
32  
33  
34  
35  
36  
37  
38  
39  
40  
41  
42  
43  
44  
45  
46  
47  
48  
49  
50  
51  
52  
53  
54  
55  
56  
57  
58  
59  
60

For peer review only

Please imagine this is a new e-cigarette that has just become available for purchase. When you look at the 5 features of the e-cigarette, which feature makes you most want to use the e-cigarette and which feature makes you least want to use the e-cigarette.

(1 of 19)

PICK ONE FROM EACH COLUMN

| E-cigarette                                                                   | Most makes me want to use | Least makes me want to use |
|-------------------------------------------------------------------------------|---------------------------|----------------------------|
| \$5 one-time purchase                                                         | <input type="radio"/>     | <input type="radio"/>      |
| It cannot be modified                                                         | <input type="radio"/>     | <input type="radio"/>      |
| Does not help me breathe easier AND still makes my clothes smell like tobacco | <input type="radio"/>     | <input type="radio"/>      |
| 5 of 10 people are able to quit tobacco cigarettes                            | <input type="radio"/>     | <input type="radio"/>      |
| Somewhat similar in size, weight appearance, and feel to a tobacco cigarette  | <input type="radio"/>     | <input type="radio"/>      |

Click the forward arrow button to continue...

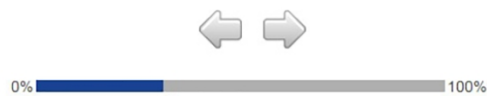

Figure 1. Example of a Best-worst Scaling Case 2 Task

250x184mm (300 x 300 DPI)

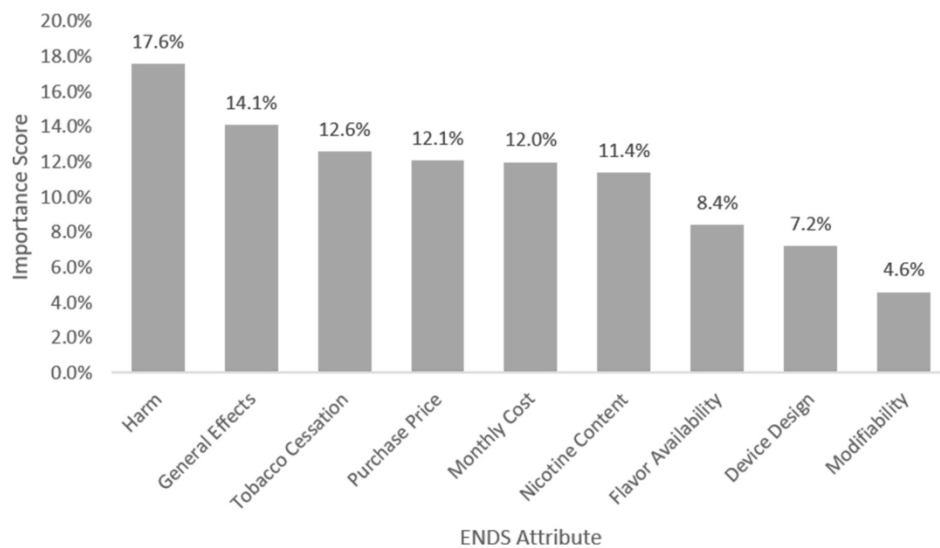

Figure 2. Importance of ENDS characteristics, n=660

152x88mm (300 x 300 DPI)

Appendix Table 1. ENDS Characteristics and Definitions

| ENDS Characteristics      | Provided Definition                                                                                                                                                                                                   |
|---------------------------|-----------------------------------------------------------------------------------------------------------------------------------------------------------------------------------------------------------------------|
| Harms of Use              | How much the device affects your health, specifically the harms to your body as compared to tobacco cigarettes. Imagine these harms are like cancer, lung diseases, circulation problems, heart attacks, and strokes. |
| General Effects of Use    | How an e-cigarette affects you overall after you use it.                                                                                                                                                              |
| Tobacco Cessation Aid     | How much the device can help a person quit using tobacco.                                                                                                                                                             |
| Purchase Price of Product | How much a person can expect to spend when starting to use the product, including the device and any other necessary pieces.                                                                                          |
| Monthly Cost of Use       | How much a person can expect to spend each month with routine use of an e-cigarette                                                                                                                                   |
| Nicotine Content          | How much nicotine is available to use in the electronic vapor product.                                                                                                                                                |
| Flavor Availability       | How many different types of e-juice flavors that the e-cigarette is available in.                                                                                                                                     |
| Device Design             | How a device looks and feels as you use it, including the feel of inhaling the device, holding the device, its appearance, and other traits.                                                                          |
| Modifiability             | Some e-cigarettes can be modified. This is how much you can alter the e-cigarette to meet your needs. This doesn't include refilling or replacing an e-juice cartridge.                                               |

# BMJ Open

## Product Attributes Important to U.S. Adult Consumers' Use of Electronic Nicotine Delivery Systems: a Discrete Choice Experiment

|                                 |                                                                                                                                                                                                                                                                                                                                                                                                                                                                                                                                                                                                                                                                                                                                                                                                                                                                                                           |
|---------------------------------|-----------------------------------------------------------------------------------------------------------------------------------------------------------------------------------------------------------------------------------------------------------------------------------------------------------------------------------------------------------------------------------------------------------------------------------------------------------------------------------------------------------------------------------------------------------------------------------------------------------------------------------------------------------------------------------------------------------------------------------------------------------------------------------------------------------------------------------------------------------------------------------------------------------|
| Journal:                        | <i>BMJ Open</i>                                                                                                                                                                                                                                                                                                                                                                                                                                                                                                                                                                                                                                                                                                                                                                                                                                                                                           |
| Manuscript ID                   | bmjopen-2018-027247.R1                                                                                                                                                                                                                                                                                                                                                                                                                                                                                                                                                                                                                                                                                                                                                                                                                                                                                    |
| Article Type:                   | Research                                                                                                                                                                                                                                                                                                                                                                                                                                                                                                                                                                                                                                                                                                                                                                                                                                                                                                  |
| Date Submitted by the Author:   | 13-Jun-2019                                                                                                                                                                                                                                                                                                                                                                                                                                                                                                                                                                                                                                                                                                                                                                                                                                                                                               |
| Complete List of Authors:       | Kistler, Christine E ; The University of North Carolina at Chapel Hill, Family Medicine<br>Ranney, Leah; University of North Carolina School of Medicine, Family Medicine; University of North Carolina at Chapel Hill, Family Medicine<br>Sutfin, Erin; Wake Forest School of Medicine, Public Health Sciences<br>Chrzan, Keith ; Sawtooth Analytics<br>Wretman, Christopher; The University of North Carolina at Chapel Hill, Cecil G. Sheps Center for Health Services Research<br>Enyioha, Chineme; The University of North Carolina at Chapel Hill, Family Medicine<br>Meernik, Clare ; University of North Carolina at Chapel Hill School of Medicine, Family Medicine<br>Berman, Micah; Ohio State University College of Public Health, Health Services Management and Policy<br>Zarkin, Gary; RTI International<br>Goldstein, A; University of North Carolina School of Medicine, Family Medicine |
| <b>Primary Subject Heading</b>: | Smoking and tobacco                                                                                                                                                                                                                                                                                                                                                                                                                                                                                                                                                                                                                                                                                                                                                                                                                                                                                       |
| Secondary Subject Heading:      | Health services research                                                                                                                                                                                                                                                                                                                                                                                                                                                                                                                                                                                                                                                                                                                                                                                                                                                                                  |
| Keywords:                       | electronic nicotine delivery system, vaping, e-cigarettes, attributes, preference                                                                                                                                                                                                                                                                                                                                                                                                                                                                                                                                                                                                                                                                                                                                                                                                                         |
|                                 |                                                                                                                                                                                                                                                                                                                                                                                                                                                                                                                                                                                                                                                                                                                                                                                                                                                                                                           |

SCHOLARONE™  
Manuscripts



1  
2  
3 **1 Product Attributes Important to U.S. Adult Consumers' Use of Electronic Nicotine**

4  
5 **2 Delivery Systems: a Discrete Choice Experiment**

6  
7  
8 **3 Authors:**

9  
10  
11 4 Christine E. Kistler, MD, MASc<sup>1,2,3</sup>

12  
13  
14 5 Leah M. Ranney, PhD, MA<sup>1,2</sup>

15  
16  
17 6 Erin L. Sutfin, PhD<sup>4</sup>

18  
19  
20 7 Keith Chrzan, MBA<sup>5</sup>

21  
22  
23 8 Christopher J. Wretman, PhD<sup>3</sup>

24  
25  
26 9 Chineme Enyioha, MD<sup>1</sup>

27  
28  
29 10 Clare Meernik, MPH<sup>1</sup>

30  
31  
32 11 Micah L. Berman, JD<sup>6</sup>

33  
34  
35 12 Gary A. Zarkin, PhD, MA<sup>7</sup>

36  
37  
38 13 Adam O. Goldstein, MD, MPH<sup>1,2</sup>

39  
40  
41 <sup>1</sup>Department of Family Medicine, School of Medicine, University of North Carolina at Chapel

42  
43  
44 Hill, Chapel Hill, NC

45  
46 <sup>2</sup>Lineberger Comprehensive Cancer Center, University of North Carolina at Chapel Hill, Chapel

47  
48  
49 Hill, NC

50  
51 <sup>3</sup>Cecil B. Sheps Center for Health Services Research, University of North Carolina at Chapel

52  
53  
54 Hill, Chapel Hill, NC

1  
2  
3 1 <sup>4</sup>Department of Social Science and Health Policy, Wake Forest School of Medicine, Winston-  
4  
5 2 Salem, NC

6  
7  
8 3 <sup>5</sup>Sawtooth Analytics

9  
10  
11 4 <sup>6</sup>College of Public Health & Moritz College of Law, Ohio State University, Columbus, OH

12  
13  
14 5 <sup>7</sup>Behavioral Health and Criminal Justice Research Division, RTI International, Research Triangle  
15  
16 6 Park, NC

17  
18  
19 7 **Corresponding Author:** Christine E. Kistler, School of Medicine, University of North Carolina,  
20  
21 8 590 Manning Drive, University of North Carolina at Chapel Hill, Chapel Hill, NC 27599,  
22  
23 9 Christine\_Kistler@med.unc.edu

24  
25  
26  
27 10 Office Number: 919.966.0543; Fax: 919.966.6126

28  
29  
30 11 **Acknowledgements:** The University of North Carolina at Chapel Hill University Cancer  
31  
32 12 Research Fund at the Lineberger Comprehensive Cancer Center supported this work. The  
33  
34 13 attributes and factors in the experiment were developed with the assistance of the CHAI Core  
35  
36 14 (Communication for Health Applications and Interventions), who is supported by the National  
37  
38 15 Institutes of Health (DK056350); and the National Institutes for Health at the National Cancer  
39  
40 16 Institute (P30 CA16086). We would also like to thank CHAI Core's Maihan Vu (M.V.) and  
41  
42 17 Randall Teal (R.T.) for qualitative coding expertise. We would like to thank Trisha Crutchfield  
43  
44 18 for her project management. The work reported in this paper was conducted by CHAI Core  
45  
46 19 (Communication for Health Applications and Interventions), who is supported in part by a grant  
47  
48 20 from NIH (DK056350) to the University of North Carolina Nutrition Obesity Research Center  
49  
50 21 and from NCI (P30-CA16086) to the UNC Lineberger Comprehensive Cancer Center.  
51  
52  
53  
54  
55  
56  
57  
58  
59  
60

1  
2  
3  
4  
5  
6  
7  
8  
9  
10  
11  
12  
13  
14  
15  
16  
17  
18  
19  
20  
21  
22  
23  
24  
25  
26  
27  
28  
29  
30  
31  
32  
33  
34  
35  
36  
37  
38  
39  
40  
41  
42  
43  
44  
45  
46  
47  
48  
49  
50  
51  
52  
53  
54  
55  
56  
57  
58  
59  
60

1 **Competing Interests:** None.

2 **Author Contributions:** CK, LMR, ELS, KC, MLB, GAZ and AOG all contributed to the  
3 conceptualization and design of the survey. CK and KC assisted with data collection. CK,  
4 LMR, ELS, KC, CJW, CE, CM, MLB, GAZ and AOG participated in the analysis of the data.  
5 All authors contributed to the content and reviewed the manuscript prior to submission.

For peer review only

1  
2  
3 1 **ABSTRACT, word count 300**  
4  
5

6 2 **Objective:** To understand the importance of electronic nicotine delivery systems (ENDS)  
7  
8 3 product attributes to adult consumers in the United States by age and gender.  
9

10  
11 4 **Design:** Cross-sectional survey with a discrete choice experiment (best-worst, case 2, scaling) of  
12  
13 5 19 choice tasks in which participants answered what would make them most want to use and  
14  
15 6 least want to use an ENDS product.  
16  
17

18  
19 7 **Setting and Participants:** A national sample of adults (age 18+) in the United States who had  
20  
21 8 tried an ENDS product at least once.  
22  
23

24 9 **Measures:** We included nine ENDS attributes with levels that varied across the 19 choice tasks.  
25  
26 10 We performed a multinomial logistic regression to obtain overall importance scores, attribute-  
27  
28 11 level part-worth utilities, and most important attribute.  
29  
30

31  
32 12 **Results:** Of 660 participants, 81% were white, 51% female, and 37% had at least a 4-year  
33  
34 13 college degree with an average age of 42.0 years (SD ±19.4). The attributes had the following  
35  
36 14 importance: *Health Effects* 17.6%; *General Effects* 14.1%; *Cessation Aid* 12.6%; *Purchase Price*  
37  
38 15 12.1%; *Monthly Cost* 12.0%; *Nicotine Content* 11.4%; *Flavor Variety* 8.4%; *Device Traits* 7.2%;  
39  
40 16 *Modifications* 4.6%. *Health Effects* was the most important attribute for all ages and genders  
41  
42 17 ( $p < 0.05$ ); variation in other important attributes existed by age, though not gender.  
43  
44  
45

46 18 **Conclusion:** This study identified the importance of nine ENDS attributes. Perceived *health*  
47  
48 19 *effects* of ENDS use appeared most important, and *modifications* was least important. Variation  
49  
50 20 by consumer group existed, which may allow for targeted interventions to modify ENDS use.  
51  
52  
53

54 21  
55  
56  
57  
58  
59  
60

## 1 Strengths and Limitations of the Study:

- 2 • Large US sample using a robust experimental design, a best-worst scaling case 2 method,  
3 incorporating large numbers of relevant attributes of electronic nicotine delivery systems  
4 (ENDS)
- 5 • Consumers found different attributes of ENDS products important to their use.
- 6 • Perceived harms of ENDS use appeared most important to their choice of ENDS  
7 products, and modifiability was least important.
- 8 • Variation by consumer group existed, which may allow for targeted interventions to  
9 modify ENDS use.
- 10 • Limitations include the convenience sample of United States ENDS users, and the use of  
11 an experimental design which may invite more socially acceptable responses as opposed  
12 to direct purchasing observations.

13 **Key Words:** electronic nicotine delivery system, e-cigarettes, vaping, importance, attributes,  
14 part-worth utilities, preference

15 **Data Sharing:** Data can be requested from [Christine Kistler@med.unc.edu](mailto:Christine.Kistler@med.unc.edu)

## 1 INTRODUCTION, word count=3785

2 Though its health effects remain unclear, the use of electronic nicotine delivery systems (ENDS)  
3 in the United States (U.S.) continues to grow even in the face of impending regulation.<sup>1</sup> While  
4 the use of combustible tobacco cigarettes has declined, the U.S. ENDS market now exceeds \$8  
5 billion.<sup>2 3</sup> The rise in the use of ENDS has occurred despite mixed evidence about its harm  
6 reduction effects or use as a tobacco cessation aid.<sup>4</sup> Given the uncertainty around ENDS, initial  
7 regulations were piece-meal and varied from state to state. However, in 2016, the Food and  
8 Drug Administration (FDA) issued a regulation deeming ENDS to fall under its authority.<sup>5</sup> These  
9 regulations will impose a variety of restrictions on ENDS manufacturing, sales, and marketing.  
10 Notably, however, the FDA has postponed implementation of some of the rule's requirements,  
11 citing the possibility that ENDS have the "potential to make a notable public health difference."<sup>6</sup>  
12 As the potential benefits and harms of ENDS become clear, regulators and public health groups  
13 will need to understand how their proposed regulations will likely affect consumers' use.  
14 Consumers use ENDS due to a variety of product attributes that may be amenable to regulation  
15 or public health campaigns.<sup>7</sup> Regulators and public health groups need to know the incremental  
16 role of individual product attributes on the decision to use ENDS products so that they can make  
17 evidence-based policies depending on how they want to modify ENDS use.  
18 A widely-used method in behavioral economics to understand consumer use is through discrete  
19 choice experiments (DCE).<sup>8 9</sup> Once the relationship between consumers' use and product  
20 attributes is understood, regulators can consider whether and how to address the attributes most  
21 important to the most consumers to either increase or decrease product use. While DCEs have  
22 been conducted to examine consumers' attitudes towards combustible tobacco regulations and  
23 smoking cessation,<sup>10-14</sup> only one has examined potential ENDS use.<sup>15</sup> This recently published

1 study conducted in Canada examined only four ENDS attributes: flavor, nicotine content, health  
2 warnings and price;<sup>15</sup> finding that health risks and efficacy as a tobacco cessation aid were the  
3 two most important attributes to consumers. However, this study only examined four attributes  
4 and included non-smokers and non-ENDS users.

5 Knowledge from our formative qualitative work was used to create a DCE with a larger number  
6 of attributes, focused on ENDS users. We examined the list of a dozen attributes important to  
7 consumers we developed from a recent structured content analysis.<sup>16</sup> Among these twelve  
8 attributes, we found nine attributes that appeared related to the ENDS device itself.<sup>16</sup> We chose  
9 to look at the device-related attributes because these attributes may be more easily regulated than  
10 other psycho-social attributes such as the ability to vape in public or as a social outlet.<sup>17 18</sup> We  
11 designed and fielded a DCE study using a best-worst scaling experiment, among a national U.S.  
12 sample of ENDS users.

## 13 **METHODS**

### 14 **Study Design**

15 We conducted a one-time survey including a best-worst scaling, case 2 design DCE of the  
16 importance of ENDS product attributes. The final version of the survey was fielded using the  
17 Research Now survey panel between August 26<sup>th</sup> and August 31<sup>st</sup>, 2016. Participants were  
18 remunerated from Research Now, in accordance with their usual rate. The institutional review  
19 board at the University of North Carolina at Chapel Hill approved this study.

### 20 **Patient and Public Involvement**

21 The attributes used in the DCE were developed through focus groups conducted as part of prior  
22 research.<sup>19</sup> The study involved participants in a pre-test phase using an academic mass email

1 system. Twelve individuals pretested the survey between May 9<sup>th</sup> and May 14<sup>th</sup>, 2016. Incentive  
2 for completing the survey included possibly receiving 1 of 4 gift cards valued at \$50 each.  
3 Feedback from the pretest led to both condensing and simplifying the language of the survey.  
4 Clarity of the survey was again improved after another round of testing with 75 survey panelists  
5 recruited from Research Now, a research survey company, between August 15<sup>th</sup> and 16<sup>th</sup>, 2016.  
6 The second episode of testing also led to language alterations surrounding questions on the flavor  
7 attribute and its levels to ensure comprehension. Participants were not involved in the  
8 recruitment to or conduct of the study. Participants in the final version of the survey did not  
9 receive their study results.

## 10 **Participants**

11 We recruited 660 members of the Research Now survey panel aged 18 and older who reported  
12 having used ENDS at least once in their lifetime to complete the ENDS survey. Research Now is  
13 one of the major online survey panel companies with over 140 million finished surveys annually.  
14 Participants had to live in the United States and be able to complete an electronic survey in  
15 English. We specifically oversampled for older adults and minimum quotas to ensure near equal  
16 balance of gender.

## 17 **Survey Design**

18 The survey was designed to include a best-worst scaling experiment related to ENDS use  
19 followed by a series of tobacco and ENDS-related questions. The survey included nineteen best-  
20 worst scaling choice tasks, followed by questions on each participant's demographics,  
21 personality, current and past use of ENDS and tobacco products, and prior attempts to quit  
22 tobacco use. Sawtooth Software was used to design the survey. Prior to the best-worst tasks, the



1 survey provided an explanation for each of the attributes, as well as an example task involving  
2 car attribute preference followed by an example of a best-worst scaling task (Figure 1). [Insert  
3 Figure 1] The participants were told that some of the attributes were real but others were not and  
4 were asked, for the purposes of the study, to pretend they were all real, and imagine each choice  
5 task as a new device. As opposed to other types of DCE methods where consumers choose  
6 between ENDS products, for each of the nineteen choice tasks, participants selected one of five  
7 listed attribute levels that they felt most likely to encourage and least likely to encourage their  
8 use of a theoretical ENDS product. While other approaches such as a classical DCE would also  
9 yield importance scores, past studies demonstrated user fatigue and attribute dominance due to  
10 complex and overwhelming survey questions, whereas best-worst scaling, though not case 2, has  
11 been used in other areas of tobacco control.<sup>20-23</sup> Additionally, best-worst scaling case 2  
12 methodology was preferred because it leads to scores on a common scale, permitting direct  
13 comparison between all attribute levels within the study, not just direct comparisons among  
14 levels within the same attribute (as is the case for other DCE methods).<sup>24 25</sup> The 660 participants  
15 received 1 of 50 versions of the survey- using a partial profile design. We sought efficiency by  
16 using a computer search algorithm to generate a design that showed each of a given attribute's  
17 levels an equal number of times (one-way level balance) and each pairing of a given attribute  
18 level with the levels of other attributes an equal number of times (two-way level balance, which  
19 reduces correlations among the attributes). These two criteria will maximize both level balance  
20 and orthogonality, the two constituents of design efficiency for experimental design for a set of  
21 single profiles. Overall, each attribute level was seen about 3 times per participant (2.97), and  
22 each valid cross-attribute pair was seen not quite half the time by each participant (0.42 times).  
23 Reliable best-worst utilities can be obtained as long as each participant sees each level about 3

1 times.<sup>26</sup> The order of attributes varied across the survey blocks so that positional balance was  
2 maintained.

### 3 **Best-worst Scaling Attributes and Levels**

4 The nine attributes were included with a definition in the survey. Their definitions can be found  
5 in the Appendix, Table 1. For the rest of the paper, we will refer to these nine as *health effects*,  
6 *general effects*, *cessation aid*, *purchase price*, *monthly cost*, *nicotine content*, *flavor variety*,  
7 *device traits*, and *modifications*.<sup>16</sup> We chose to divide cost into a separate purchase price and  
8 monthly cost attributes because of the variation that can be seen in each; the focus group  
9 members mentioned the two attributes separately as well. Rates of tobacco cessation for ENDS  
10 products were drawn from the evidence that ENDS are often used as a tobacco cessation aid,  
11 regardless of actual effectiveness. It is worth noting that medications prescribed for assisting in  
12 tobacco cessation (e.g., bupropion, varenicline, nicotine containing products) have only a 2 out  
13 of 10 success rate at best.<sup>27</sup> Nicotine content levels were drawn from the current spectrum of  
14 labelled nicotine concentrations.<sup>28</sup> In addition to the actual concentration, we included a label of  
15 “none”, “low”, etc, to denote where in the range of concentrations, a particular concentration  
16 falls.

### 17 **Other Measures**

18 Participants responded to questions about sex, age, race and ethnicity, perceptions of general  
19 health,<sup>29</sup> education level, and yearly household income. The survey then collected details about  
20 each participants’ tobacco and ENDS use behaviors. Items included the heaviness of smoking  
21 index, which asks participants "At present, how long after waking do you wait before having  
22 your first cigarette (in mins)?" and "How many cigarettes do you smoke per day at present?"<sup>30</sup>

1 and other questions from the National Adult Tobacco Survey Questionnaire, 2012-2013, such as  
2 age of first cigarette, number of cigarettes smoked per day, and smoking days per month.<sup>31</sup>

### 3 **Analysis**

4 In DCEs, respondents are given tasks that combine possible varieties of product attributes and  
5 asked to make a choice; in our case, which attribute of the product was important to their use.  
6 With enough choice tasks, estimated importance scores can be generated, indicating which  
7 attribute most influenced their choices. The statistical model underlying best-worst scaling  
8 assumes that the relative choice probability of a given pair of best-worst choices is proportional  
9 to the distance between the two attribute levels on the latent utility scale. The pair of attribute  
10 levels chosen maximizes the difference in the part-worth utilities for a given choice task. These  
11 distances between attribute levels are modelled as a difference model, with variations on best-  
12 worst scaling sometimes called “maximum difference scaling”.<sup>32</sup> Using a multinomial regression  
13 model, these differences can provide the part-worth utilities relative to a single attribute level,  
14 rather than relative to the sample mean.<sup>24</sup> Part-worth utilities are zero-centered numerical values  
15 that represent the relative desirability of the levels within each attribute. The higher the number,  
16 the more desirable the attribute’s level is to participants. Importance scores were then calculated,  
17 based on the difference between minimum and maximum part-worth utilities within an  
18 attribute.<sup>25 33</sup> The total importance of all attributes to a decision is 100%, with each attribute a  
19 percentage of that total importance. Most important attribute was determined by comparing the  
20 importance scores for each individual, defining the attribute with the largest importance score as  
21 most important. In order to examine changes in attribute importance by age and gender, we  
22 performed a dependent z-test of proportions to compare the most important attribute to the next  
23 highest ranked attribute by age and gender.

## 1 RESULTS

2 Of 900 individuals surveyed, 660 participants had used ENDS at least one time. Participants had  
3 a mean age of 42 ((SD)  $\pm$  19.4), with a range from 18 to 82 years-old, and were evenly split  
4 female versus male (51% v 49%) (Table 1) [insert Table 1]. Most participants were white (81%),  
5 making less than \$60,000 annually (60%), and self-reported very good or excellent health (60%).  
6 Sixty-four percent had used ENDS in the last 30 days. Almost all participants (92%) reported a  
7 history of traditional tobacco products and most (85%) had tried to quit tobacco in the past 12  
8 months. Pearson's  $\chi^2$  tests of the relation between age and tobacco use characteristics found  
9 statistically significant ( $p < .05$ ) differences between sub-groups of young (18-24), middle-aged  
10 (25-49), and older (50+) adults. For example, young adult participants were more likely to have  
11 used ENDS in the last 30 days ( $p = .036$ ) and to have used flavored ENDS ( $p = .012$ ). Older  
12 adults were less likely to use ENDS ( $p < .001$ ) and more likely to smoke one pack/day of  
13 traditional tobacco ( $p < .001$ ) (see table 2).

### 14 Importance of ENDS attributes overall and by subgroup

15 The overall importance scores for the nine attributes are found in Figure 2. [Insert Figure 2] The  
16 attributes had the following importance distribution: *Health Effects* 17.6%; *General Effects*  
17 14.1%; *Cessation Aid* 12.6%; *Purchase Price* 12.1%; *Monthly Cost* 12.0%; *Nicotine Content*  
18 11.4%; *Flavor Variety* 8.4%; *Device Traits* 7.2%; *Modifications* 4.6%. Independent t-tests of the  
19 importance scores by gender found that when compared with males, female participants were  
20 more likely to give importance to *Health Effects* ( $\Delta+9.7\%$ ;  $p < .001$ ) and *General Effects*  
21 ( $\Delta+8.1\%$ ;  $p = .002$ ), and less likely to give importance to *Purchase Price* ( $\Delta-8.3\%$ ;  $p = .011$ ) and  
22 *Monthly Cost* ( $\Delta-6.8\%$ ;  $p = .008$ ).

1 Numerous statistically significant differences were found by age sub-groups. Younger adults  
2 compared with middle-aged and older adults together were more likely to give importance to  
3 *Modifications* ( $\Delta+22\%$ ;  $p = .004$ ) and less likely to give importance to *Purchase Price* ( $\Delta-11\%$ ;  
4  $p = .006$ ). Middle-aged adults compared with young and older adults together were more likely  
5 to give importance to *Modifications* ( $\Delta+24\%$ ;  $p = .001$ ) and less likely to give importance to  
6 *Health Effects* ( $\Delta-5\%$ ;  $p = .027$ ). Older adults compared with middle-aged and young adults  
7 together were more likely to give importance to *Purchase Price* ( $\Delta+11\%$ ;  $p = .004$ ) and less  
8 likely to give importance to *Modifications* ( $\Delta-34\%$ ;  $p < .001$ ).

### 9 **Part-worth utilities of ENDS attribute levels**

10 The part-worth utility scores for the levels of the nine attributes are shown in Table 2. [Insert  
11 Table 2] *Health Effects* had the level with the highest part-worth utility of 88.96 (90% CI: 84.79,  
12 93.13), followed by *General Effects* with a level at 58.37 (90% CI: 55.07, 61.68), and *Purchase*  
13 *Price* at 52.41 (90% CI: 49.12, 55.70). *Cessation Aid* had the level with the lowest part-worth  
14 utility of  $-49.11$  (90% CI:  $-52.46$ ,  $-45.75$ ), followed by *Health Effects* at  $-47.27$  (90% CI:  
15  $-49.69$ ,  $-44.86$ ).

### 16 **Most important ENDS attribute overall and by sub-group**

17 After examining the importance scores for each individual, *Health Effects* was the most  
18 important attribute for 49% of participants (Table 3). [Insert Table 3] *Nicotine Content* was next  
19 most frequent (13%) and *Purchase Price* was third (12%). A goodness-of-fit  $\chi^2$  test determined  
20 that the nine attributes differed from expected and thus were not equally distributed among  
21 participants ( $p < .001$ ). Also, dependent z-tests of the proportions of the second through ninth  
22 ranked attributes against *Health Effects* found that all were significantly lower ranked and were

1 less likely to be chosen as most important (Range:  $\Delta$ -83%-99%;  $p < .001$ ). Aside from *Nicotine*  
2 *Content* compared with *Health Effects*, stepped tests of each attribute against its nearest found  
3 that only *Device Traits* ( $p = .005$ ) and *Modifications* ( $p = .020$ ) were statistically significantly  
4 less important.

5 The nine attributes also statistically significantly differed from the expected distribution by the  
6 sub-groups for age and gender ( $p < .001$ ). Pearson's  $\chi^2$  tests of the relation between the age sub-  
7 groups and most important attribute found that *General Effects* was the most important attribute  
8 for younger adults as compared to other ages ( $p < .001$ ). Compared to younger and older adults,  
9 *General Effects* was less likely to be the most important attribute for middle aged adults ( $p = .029$ )  
10 and *Flavor Variety* was more likely to be most important ( $p = .018$ ). Compared to both younger  
11 and middle-aged adults, *Health Effects* was more likely to be most important ( $p = .016$ ) and *Flavor*  
12 *Variety* less likely ( $p = .003$ ). There were no statistically significant differences in the distribution  
13 of most important attributes by gender though *Health Effects* ( $p = .061$ ) and *Cessation Aid* ( $p =$   
14  $.075$ ) approached significance.

## 15 **DISCUSSION**

16 In our study of US adult ENDS consumers, we found that *Health Effects* had the highest  
17 importance to consumers' choice of an ENDS product. Other than cost (i.e., *Purchase Price* and  
18 *Monthly Cost*), the attributes with the highest importance scores hinged on consumers'  
19 perceptions of efficacy as a harm reduction strategy (*Health Effects*), health benefit (*General*  
20 *Effects*), and tobacco cessation (*Cessation Aid*), respectively. Consumers of different ages varied  
21 in importance they placed on different ENDS product characteristics. As more evidence about  
22 these products' ability to benefit or harm consumers is more fully understood, public health

1  
2  
3 1 initiatives could target these perceptions. Variation by consumer group existed, which may allow  
4  
5 2 for targeted interventions to reduce or enhance ENDS use in any given consumer group.  
6  
7  
8 3 ENDS products are marketed as healthier than combustible tobacco products,<sup>34</sup> but the evidence  
9  
10 4 regarding the impact of ENDS products on human health is slowly emerging. National  
11  
12 5 Academies of Science, Engineering, and Medicine recently released a report on the public health  
13  
14 6 consequences of ENDS products.<sup>35</sup> While there is substantial evidence that, except for nicotine,  
15  
16 7 exposure to potentially toxic substances from ENDS is significantly lower compared with  
17  
18 8 combustible tobacco products, there is also substantial evidence that exposure to ENDS aerosols  
19  
20 9 can induce lung dysfunction and oxidative stress in human tissue.<sup>36</sup> The long-term effects on  
21  
22 10 cardiovascular outcomes, cancer or other health conditions are unclear. Our work should add a  
23  
24 11 sense of urgency to the push for ongoing research into the evidence for and against ENDS  
25  
26 12 products as a harm reduction strategy. The idea that an ENDS product was less harmful than  
27  
28 13 tobacco cigarettes was extremely important to participants' choice. The level, that the product  
29  
30 14 was "less harmful on my body as compared to tobacco cigarettes", had the highest part-worth  
31  
32 15 utility of any attribute (88.96). Moreover, the level that the product "had the same amount of  
33  
34 16 harm on my body as compared to tobacco cigarettes" caused people to avoid choosing that  
35  
36 17 product and had a negative utility (-22.45). Both the *Health Effects* and the use as a *Cessation*  
37  
38 18 *Aid* had levels that are likely healthier and of more help in cessation than the evidence suggests.  
39  
40 19 Yet in general, perceptions, including misperceptions, affect smokers' behavior.<sup>37</sup> The look and  
41  
42 20 feel of cigarette packaging appears to influence consumers' use and may affect their perceptions'  
43  
44 21 of the healthiness and harm of the cigarettes within.<sup>38</sup> A study of combustible tobacco labeling  
45  
46 22 revealed that "additive-free" or "natural" labels on current cigarette brands were misperceived to  
47  
48 23 be possibly less harmful than other brands of cigarettes and may reduce the efficacy of public  
49  
50  
51  
52  
53  
54  
55  
56  
57  
58  
59  
60

1 health initiatives.<sup>39</sup> Even efforts by the Federal Trade Commission to prohibit language that  
2 might create misperceptions of reduced harm in tobacco cigarettes has been unsuccessful.<sup>37</sup> This  
3 (mis)perception of harm and health appears to strongly influence the choice of ENDS products.  
4 Further efforts, including those studying clear labeling and health warnings, are needed to  
5 explore how to align ENDS users' perceptions of ENDS products with the evidence.

6 While *Health Effects* had the highest importance score, the combined importance of *Purchase*  
7 *Price* and *Monthly Cost* was greater than *Health Effects*, so the importance of financial burden on  
8 ENDS use should not be underestimated. If we combine the two cost-related attributes, *Purchase*  
9 *Price* and *Monthly Cost*, overall cost's importance score would be 24.1% as compared to 17.6%  
10 for *Health Effects*. A recent study of the cross-price elasticity of ENDS and tobacco cigarettes  
11 found that ENDS are partially substitutable for cigarettes.<sup>40</sup> However, the availability of ENDS  
12 also reduced the number who reported they would quit smoking if cigarette costs increased by  
13 20% (50.2% to 30.0%), revealing that ENDS may discourage smokers from quitting  
14 completely.<sup>41</sup> Additionally, increases in the cost of ENDS products may shift consumers back  
15 towards combustible tobacco, though recent simulations found no relationship between cigarette  
16 prices and ENDS use.<sup>42</sup> Taxation may reduce ENDS use but further work is needed to model the  
17 consequences of price increases on ENDS use.

18 Potentially meaningful differences were found in the importance of ENDS product attributes and  
19 the most important attribute by different age groups. Younger and middle-aged adults found  
20 *Modifications* to be more important than older adults. While we did not see gender differences  
21 for attribute preferences, a Canadian DCE study of young women found that pack structure was  
22 the most important attribute driving ENDS use.<sup>14</sup> The shape and structure of the device and  
23 packaging may be more important to a younger population. Younger adults were more likely to



1  
2  
3 1 have *General Effects* as their most important attribute while *Flavor Variety* was more likely to be  
4  
5 2 most important to middle-aged adults and significantly less likely to be most important to older  
6  
7 3 adults. A systematic review of studies of consumers' preference for flavor found flavor to be  
8  
9 4 likely important to young people.<sup>7</sup> However, as with our own qualitative study, which was  
10  
11 5 included in the review, many of the included studies did not have experimental designs.<sup>16</sup>  
12  
13 6 Interestingly, another Canadian DCE study of ENDS use found that younger smokers perceived  
14  
15 7 cherry flavor as less harmful while older adults found tobacco flavor less harmful.<sup>15</sup> While we  
16  
17 8 found *Flavor Availability* was more important to middle-aged adults, we did not find older adults  
18  
19 9 favored tobacco flavoring. However, both of these studies found that attributes related to the  
20  
21 10 users' health (*health effects* in our case and health warnings in the Canadian study) were more  
22  
23 11 important than flavor, and thus efforts to regulate flavors may not reduce ENDS use as much as  
24  
25 12 other regulations on other attributes, such as health effects.  
26  
27 13 Our study has several important limitations. First, our study examines choice behavior and not  
28  
29 14 actual purchase behavior. While we drew from a national online survey panel, our respondent  
30  
31 15 population is limited to a convenience sample. Additionally, best-worst scaling can be subject to  
32  
33 16 attribute non-attendance, where participants either fail to pay attention to an attribute or  
34  
35 17 attributes, or attribute dominance, where participants only pay attention to a single attribute. We  
36  
37 18 found that only about 2% of participants did not attend to the majority of attributes, though about  
38  
39 19 16% failed to attend to at least one attribute. No participant showed dominance behavior. While  
40  
41 20 there was some attribute non-attendance, best-worst scaling inclines participants to make  
42  
43 21 judgements about more attributes and does not invite as much attribute non-attendance or  
44  
45 22 dominance as can be seen in other standard DCEs. However, it seems more likely that socially  
46  
47 23 desirable responses could bias respondents' choices within best-worst scaling than other DCEs  
48  
49  
50  
51  
52  
53  
54  
55  
56  
57  
58  
59  
60

1 might.<sup>24</sup> Lastly, while we did extensive pre-testing, it is possible that different participants  
2 interpreted different attributes and levels differently. For example, it is possible that participants  
3 viewed the monthly cost of use in relation to their own use and thus the responses to monthly  
4 cost may need to be viewed with caution.

## 5 CONCLUSION

6 A variety of ENDS product attributes are important to consumers. *Health Effects* had the highest  
7 importance to consumers' choice of an ENDS product. Other than cost, the attributes with the  
8 highest importance scores hinged on consumers' perceptions of efficacy as a harm reduction  
9 strategy (*Health Effects*), general benefit (*General Effects*), and tobacco cessation (*Cessation*  
10 *Aid*), respectively. Consumers differed by age group in some of the more important attributes.  
11 Though the overall importance of ENDS product attributes was similar, efforts to increase or  
12 decrease ENDS use could be tailored to these group differences.

## 17 REFERENCES

- 18 1. Pauly J, Li Q, Barry MB. Tobacco-free electronic cigarettes and cigars deliver nicotine and generate  
19 concern. *Tob Control* 2007;16(5):357-57. doi: 10.1136/tc.2006.019687
- 20 2. Jamal A, Phillips E, Gentzke AS, et al. Current Cigarette Smoking Among Adults - United States, 2016.  
21 *MMWR Morb Mortal Wkly Rep* 2018;67(2):53-59. doi: 10.15585/mmwr.mm6702a1
- 22 3. MacGuill S. What Is The New Tobacco Data Telling Us: Euromonitor International; 2017 [updated June  
23 20, 2016. Available from: [https://blog.euromonitor.com/2016/06/what-is-the-new-tobacco-](https://blog.euromonitor.com/2016/06/what-is-the-new-tobacco-data-telling-us.html)  
24 [data-telling-us.html](https://blog.euromonitor.com/2016/06/what-is-the-new-tobacco-data-telling-us.html) accessed January 21, 2018.

- 1 4. Callahan-Lyon P. Electronic cigarettes: human health effects. *Tob Control* 2014;23(Suppl 2):ii36-ii40.  
2 doi: 10.1136/tobaccocontrol-2013-051470
- 3 5. Backinger CL, Meissner HI, Ashley DL. The FDA "Deeming Rule" and Tobacco Regulatory Research.  
4 *Tobacco regulatory science* 2016;2(3):290-93. doi: 10.18001/TRS.2.3.8
- 5 6. Administration USFaD. FDA's Plan for Tobacco and Nicotine Regulation.
- 6 7. Zare S, Nemati M, Zheng Y. A systematic review of consumer preference for e-cigarette attributes:  
7 Flavor, nicotine strength, and type. *PLoS One* 2018;13(3):e0194145. doi:  
8 10.1371/journal.pone.0194145
- 9 8. de Bekker-Grob EW, Hol L, Donkers B, et al. Labeled versus unlabeled discrete choice experiments in  
10 health economics: an application to colorectal cancer screening. *Value Health* 2010;13(2):315-  
11 23. doi: 10.1111/j.1524-4733.2009.00670.x [published Online First: 2009/11/17]
- 12 9. Bech-Larsen T, Nielsen NA. A comparison of five elicitation techniques for elicitation of attributes of  
13 low involvement products. *Journal of Economic Psychology* 1999;20(3):315-41. doi:  
14 [http://dx.doi.org/10.1016/S0167-4870\(99\)00011-2](http://dx.doi.org/10.1016/S0167-4870(99)00011-2)
- 15 10. Marti J. Assessing preferences for improved smoking cessation medications: a discrete choice  
16 experiment. *Eur J Health Econ* 2012;13(5):533-48. doi: 10.1007/s10198-011-0333-z
- 17 11. Marti J. A best-worst scaling survey of adolescents' level of concern for health and non-health  
18 consequences of smoking. *Soc Sci Med* 2012;75(1):87-97. doi: 10.1016/j.socscimed.2012.02.024
- 19 12. Goto R, Takahashi Y, Ida T. Changes in smokers' attitudes toward intended cessation attempts in  
20 Japan. *Value Health* 2011;14(5):785-91. doi: 10.1016/j.jval.2010.12.010
- 21 13. Goto R, Nishimura S, Ida T. Discrete choice experiment of smoking cessation behaviour in Japan. *Tob*  
22 *Control* 2007;16(5):336-43. doi: 10.1136/tc.2006.019281
- 23 14. Kotnowski K, Fong GT, Gallopel-Morvan K, et al. The Impact of Cigarette Packaging Design Among  
24 Young Females in Canada: Findings From a Discrete Choice Experiment. *Nicotine & Tobacco*  
25 *Research* 2015 doi: 10.1093/ntr/ntv114
- 26 15. Czoli CD, Goniewicz M, Islam T, et al. Consumer preferences for electronic cigarettes: results from a  
27 discrete choice experiment. *Tob Control* 2015 doi: 10.1136/tobaccocontrol-2015-052422
- 28 16. Kistler CE, Crutchfield TM, Sutfin EL, et al. Consumers' Preferences for Electronic Nicotine Delivery  
29 System Product Features: A Structured Content Analysis. *International Journal of Environmental*  
30 *Research and Public Health* 2017;14(6):613. doi: 10.3390/ijerph14060613
- 31 17. Hoek J, Thrul J, Ling P. Qualitative analysis of young adult ENDS users' expectations and  
32 experiences. *BMJ Open* 2017;7(3)
- 33 18. Keane H, Weier M, Fraser D, et al. 'Anytime, anywhere': vaping as social practice. *Critical Public*  
34 *Health* 2017;27(4):465-76. doi: 10.1080/09581596.2016.1250867
- 35 19. Kistler CE, Crutchfield TM, Sutfin EL, et al. Consumers' Preferences for Electronic Nicotine Delivery  
36 System Product Features: A Structured Content Analysis. *Int J Environ Res Public Health*  
37 2017;14(6) doi: 10.3390/ijerph14060613
- 38 20. Mühlbacher AC, Kaczynski A, Zweifel P, et al. Experimental measurement of preferences in health  
39 and healthcare using best-worst scaling: an overview. *Health Economics Review* 2016;6:2. doi:  
40 10.1186/s13561-015-0079-x
- 41 21. Gendall P, Eckert C, Hoek J, et al. Estimating the effects of novel on-pack warnings on young adult  
42 smokers and susceptible non-smokers. *Tob Control* 2018;27(5):519-25. doi:  
43 10.1136/tobaccocontrol-2017-053719
- 44 22. Hoek J, Gendall P, Eckert C, et al. Dissuasive cigarette sticks: the next step in standardised ('plain')  
45 packaging? *Tob Control* 2016;25(6):699-705. doi: 10.1136/tobaccocontrol-2015-052533
- 46 23. Hoek J, Gendall P, Eckert C, et al. Effects of brand variants on smokers' choice behaviours and risk  
47 perceptions. *Tob Control* 2016;25(2):160-5. doi: 10.1136/tobaccocontrol-2014-052094

- 1 24. Orme B. The MaxDiff System Technical Paper. *Technical Paper Series* 2013.  
2 <https://www.sawtoothsoftware.com/download/techpap/maxdifftech.pdf> (accessed February 8,  
3 2018).
- 4 25. Louviere JJ, Flynn TN. Using Best-Worst Scaling Choice Experiments to Measure Public Perceptions  
5 and Preferences for Healthcare Reform in Australia. *Patient* 2010;3(4):275-83. doi:  
6 <http://dx.doi.org/10.2165/11539660-000000000-00000>
- 7 26. Orme B. Accuracy of HB Estimation in MaxDiff Experiments. Sawtooth Software: Research Paper  
8 Series. Sequim, WA: Sawtooth Software, Inc, 2005.
- 9 27. West R, Raw M, McNeill A, et al. Health-care interventions to promote and assist tobacco cessation:  
10 a review of efficacy, effectiveness and affordability for use in national guideline development.  
11 *Addiction (Abingdon, England)* 2015;110(9):1388-403. doi: 10.1111/add.12998
- 12 28. Goniewicz ML, Gupta R, Lee YH, et al. Nicotine levels in electronic cigarette refill solutions: A  
13 comparative analysis of products from the U.S., Korea, and Poland. *Int J Drug Policy*  
14 2015;26(6):583-88. doi: 10.1016/j.drugpo.2015.01.020 [published Online First: 2015/02/07]
- 15 29. Cunny KA, Matthew Perri I. Single-Item Vs Multiple-Item Measures of Health-Related Quality of Life.  
16 *Psychol Rep* 1991;69(1):127-30. doi: 10.2466/pr0.1991.69.1.127
- 17 30. Heatherton TF, Kozlowski LT, Frecker RC, et al. Measuring the Heaviness of Smoking: using self-  
18 reported time to the first cigarette of the day and number of cigarettes smoked per day. *Br J*  
19 *Addict* 1989;84(7):791-99.
- 20 31. Prevention CfDCa. National Adult Tobacco Survey Questionnaire, 2012–2013. 2014
- 21 32. Szeinbach SL, Barnes JH, McGhan WF, et al. Using conjoint analysis to evaluate health state  
22 preferences. *Drug Inf J* 1999;33(3):849.
- 23 33. Flynn TN, Louviere JJ, Peters TJ, et al. Best–worst scaling: What it can do for health care research and  
24 how to do it. *J Health Econ* 2007;26(1):171-89. doi:  
25 <http://dx.doi.org/10.1016/j.jhealeco.2006.04.002>
- 26 34. Zhu S-H, Sun JY, Bonnevie E, et al. Four hundred and sixty brands of e-cigarettes and counting:  
27 implications for product regulation. *Tob Control* 2014;23(Suppl 3):iii3-iii9. doi:  
28 10.1136/tobaccocontrol-2014-051670
- 29 35. National Academies of Sciences E, and Medicine. Public Health Consequences of E-Cigarettes.  
30 Washington, DC: The National Academies Press 2018.
- 31 36. Carnevale R, Sciarretta S, Violi F, et al. Acute Impact of Tobacco vs Electronic Cigarette Smoking on  
32 Oxidative Stress and Vascular Function. *Chest* 2016;150(3):606-12. doi:  
33 <https://doi.org/10.1016/j.chest.2016.04.012>
- 34 37. Yong H-H, Borland R, Cummings KM, et al. US Smokers' Beliefs, Experiences and Perceptions of  
35 Different Cigarette Variants Before and After the FSPTCA Ban on Misleading Descriptors Such as  
36 "Light," "Mild," or "Low". *Nicotine & Tobacco Research* 2016;18(11):2115-23. doi:  
37 10.1093/ntr/ntw107
- 38 38. McNeill A, Gravely S, Hitchman SC, et al. Tobacco packaging design for reducing tobacco use. 2017  
39 doi: 10.1002/14651858.CD011244.pub2
- 40 39. Leas EC, Ayers JW, Strong DR, et al. Which cigarettes do Americans think are safer? A population-  
41 based analysis with wave 1 of the PATH study. *Tob Control* 2017;26(E1):e59-e60. doi:  
42 10.1136/tobaccocontrol-2016-053334
- 43 40. Quisenberry AJ, Koffarnus MN, Hatz LE, et al. The Experimental Tobacco Marketplace I:  
44 Substitutability as a Function of the Price of Conventional Cigarettes. *Nicotine & Tobacco*  
45 *Research* 2015 doi: 10.1093/ntr/ntv230
- 46 41. Grace RC, Kivell BM, Laugesen M. Estimating Cross-Price Elasticity of E-Cigarettes Using a Simulated  
47 Demand Procedure. *Nicotine & Tobacco Research* 2015;17(5):592-98. doi: 10.1093/ntr/ntu268

Table 1. Participants' Demographic Characteristics, N (%)

| Characteristics | Total, N=660 | Age 18-24,<br>N=169 | Age 25-49,<br>N=242 | Age 50+,<br>N= 249 |
|-----------------|--------------|---------------------|---------------------|--------------------|
| Age, mean (SD)  | 42.0 (19.4)  | 22.2 (1.6)          | 32.1 (7.7)          | 65.0 (6.9)         |
| Female          | 334 (51%)    | 90 (53%)            | 120 (49%)           | 124 (50%)          |
| Race            |              |                     |                     |                    |

42. Huang J, Tauras J, Chaloupka FJ. The impact of price and tobacco control policies on the demand for electronic nicotine delivery systems. *Tob Control* 2014;23(Suppl 3):iii41-iii47. doi: 10.1136/tobaccocontrol-2013-051515

## ENDS Best-Worst Scaling

|                                                                           |           |           |            |            |
|---------------------------------------------------------------------------|-----------|-----------|------------|------------|
| White                                                                     | 532 (81%) | 113 (67%) | 191 (79%)  | 228 (92%)  |
| Black                                                                     | 42 (6%)   | 14 (8%)   | 18 (7%)    | 10 (4%)    |
| Asian-American                                                            | 40 (6%)   | 20 (12%)  | 18 (7%)    | 2 (1%)     |
| Other                                                                     | 46 (7%)   | 22 (13%)  | 15 (6%)    | 9 (4%)     |
| Hispanic or Latino/Latina                                                 | 94 (14%)  | 42 (25%)  | 45 (19%)   | 7 (3%)     |
| College degree or higher                                                  | 247 (37%) | 37 (22%)  | 113 (47%)  | 97 (38%)   |
| Overall Health, very good or excellent                                    | 396 (60%) | 110 (65%) | 160 (66%)  | 126 (51%)  |
| Annual Household Income,                                                  |           |           |            |            |
| \$0 to \$29,999                                                           | 149 (23%) | 52 (31%)  | 51 (21%)   | 46 (18%)   |
| \$30,000 to \$59,999                                                      | 247 (37%) | 75 (44%)  | 85 (35%)   | 87 (35%)   |
| \$60,000 to \$89,999                                                      | 156 (24%) | 25 (15%)  | 73 (30%)   | 58 (23%)   |
| \$90,000 or more                                                          | 106 (16%) | 17 (10%)  | 33 (14%)   | 58 (23%)   |
| Knowledge that quitting smoking with help is more successful than without | 310 (47%) | 75 (44%)  | 108 (45%)  | 127 (51%)  |
| Used ENDS in last 30 days <sup>1</sup>                                    | 387 (64%) | 109 (71%) | 153 (69%)* | 125 (54%)* |
| Used flavored ENDS in last 30 days, of current ENDS users <sup>2</sup>    | 296 (70%) | 93 (79%)* | 134 (79%)* | 69 (52%)*  |
| Anticipates ENDS use in next year                                         | 478 (72%) | 121 (72%) | 193 (80%)* | 164 (66%)* |
| Ever used traditional tobacco products                                    | 607 (92%) | 154 (91%) | 221 (91%)  | 232 (93%)  |
| Age at first cigarette, mean (SD) <sup>1</sup>                            | 17 (6)    | 16 (3)    | 18 (5)     | 18 (8)     |
| Smokes more than 1 pack/day <sup>3</sup>                                  | 54 (12%)  | 3 (3%)*   | 12 (8%)*   | 39 (23%)*  |
| First smoke within 30 minutes of waking <sup>3</sup>                      | 256 (59%) | 48 (44%)* | 89 (59%)   | 119 (70%)* |
| Tobacco quit attempt in past 12 months <sup>3</sup>                       | 369 (85%) | 87 (79%)* | 130 (85%)  | 152 (89%)  |

Note. \*  $p < .05$ ; Test versus total. <sup>1</sup> n=607, 154, 221, and 232, respectively; <sup>2</sup> n=420, 117, 170, and 133, respectively; <sup>3</sup> n=432, 110, 152, and 170, respectively.

Table 2. Final ENDS attributes, levels, and mean utilities, n=660

| ENDS Attributes | Levels of ENDS Attributes                                 | Part-worth Utilities, Mean (95% CI) |
|-----------------|-----------------------------------------------------------|-------------------------------------|
| Harms of Use    | Less harmful on my body as compared to tobacco cigarettes | 88.96 (84.79, 93.13)                |
|                 | Unknown harm on my body as compared to tobacco cigarettes | -19.24 (-21.32, -17.17)             |

## ENDS Best-Worst Scaling

|                           |                                                                               |                         |
|---------------------------|-------------------------------------------------------------------------------|-------------------------|
|                           | Same amount of harm on my body as compared to tobacco cigarettes              | -22.45 (-24.90, -19.99) |
|                           | More harmful on my body as compare to tobacco cigarettes                      | -47.27 (-49.69, -44.86) |
| General Effects of Use    | Helps me breathe easier AND my clothes don't smell like tobacco               | 58.37 (55.07, 61.68)    |
|                           | Helps me breathe easier, BUT my clothes smell like tobacco                    | -3.50 (-5.78, -1.22)    |
|                           | Does not help me breathe easier, BUT my clothes don't smell like tobacco      | -12.35 (-14.78, -9.93)  |
|                           | Does not help me breathe easier BUT still makes my clothes smell like tobacco | -42.52 (-45.15, -39.89) |
| Tobacco Cessation         | 7 of 10 people are able to quit tobacco cigarettes                            | 41.92 (39.36, 44.47)    |
|                           | 5 of 10 people are able to quit tobacco cigarettes                            | 19.98 (18.20, 21.76)    |
|                           | 2 of 10 people are able to quit tobacco cigarettes                            | -12.79 (-14.84, -10.73) |
|                           | People are not able to quit smoking tobacco cigarettes                        | -49.11 (-52.46, -45.75) |
| Purchase Price of Product | \$5 one-time purchase                                                         | 52.41 (49.12, 55.70)    |
|                           | \$55 one-time purchase                                                        | 12.40 (11.02, 13.77)    |
|                           | \$115 one-time purchase                                                       | -26.04 (-27.92, -24.17) |
|                           | \$175 one-time purchase                                                       | -38.76 (-40.95, -36.57) |
| Monthly Cost of Use       | \$5 per month to use                                                          | 47.50 (44.72, 50.29)    |
|                           | \$25 per month to use                                                         | 16.68 (15.00, 18.37)    |
|                           | \$65 per month to use                                                         | -22.16 (-23.91, -20.42) |
|                           | \$100 per month to use                                                        | -42.03 (-44.37, -39.68) |
| Nicotine Content*         | None (0 mg/ml)                                                                | 10.89 (6.83, 14.96)     |
|                           | Low (6 mg/ml)                                                                 | 18.29 (16.16, 20.41)    |
|                           | Medium (12 mg/ml)                                                             | 2.11 (-0.01, 4.23)      |
|                           | High (24 mg/ml)                                                               | -31.30 (-35.12 -27.47)  |

## ENDS Best-Worst Scaling

|                     |                                                                                |                         |
|---------------------|--------------------------------------------------------------------------------|-------------------------|
| Flavor Availability | Available in fruit, candy, coffee, wine and other flavors                      | 15.88 (13.32, 18.44)    |
|                     | Available in tobacco and menthol flavors                                       | 13.50 (11.94, 15.05)    |
|                     | Available without any flavoring                                                | -29.38 (-32.27, -26.48) |
| Device Design       | Very similar in size, weight, appearance, and feel to a tobacco cigarette      | 12.85 (11.16, 14.54)    |
|                     | Somewhat similar in size, weight, appearance, and feel to a tobacco cigarette  | 14.47 (12.87, 16.07)    |
|                     | Not similar at all in size, weight, appearance and feel to a tobacco cigarette | -27.32 (-29.98, -24.66) |
| Modifiability       | Various parts can be modified                                                  | 12.46 (10.68, 14.23)    |
|                     | It cannot be modified                                                          | -12.46 (-14.23, -10.68) |

Note: \*Nicotine levels corresponded to what the current literature designated as low, medium and high levels of nicotine.

**Table 3. Most Important Attribute, n (%)**

| ENDS Characteristics | Total<br>N=660 | Age 18-24<br>N=169 | Age 25-49<br>N=242 | Age 50+<br>N=249       | Male<br>N=326 | Female<br>N=334 |
|----------------------|----------------|--------------------|--------------------|------------------------|---------------|-----------------|
| Harms of Use         | 326 (49%)      | 74 (44%)           | 114 (47%)          | 138 (55%) <sup>a</sup> | 149 (46%)     | 177 (53%)       |



## ENDS Best-Worst Scaling

|                           |           |                       |                      |                     |          |          |
|---------------------------|-----------|-----------------------|----------------------|---------------------|----------|----------|
| Nicotine Content          | 85 (13%)* | 26 (15%)              | 32 (13%)             | 27 (11%)            | 42 (13%) | 43 (13%) |
| Purchase Price of Product | 77 (12%)  | 14 (8%)               | 30 (12%)             | 33 (13%)            | 42 (13%) | 35 (10%) |
| General Effects of Use    | 56 (9%)   | 26 (15%) <sup>a</sup> | 13 (5%) <sup>a</sup> | 17 (7%)             | 24 (7%)  | 32 (10%) |
| Tobacco Cessation Aid     | 45 (7%)   | 11 (6%)               | 16 (7%)              | 18 (7%)             | 28 (9%)  | 17 (5%)  |
| Flavor Availability       | 32 (5%)   | 10 (6%)               | 18 (7%) <sup>a</sup> | 4 (2%) <sup>a</sup> | 18 (5%)  | 14 (4%)  |
| Monthly Cost of Use       | 27 (4%)   | 7 (4%)                | 11 (5%)              | 9 (4%)              | 17 (5%)  | 10 (3%)  |
| Device Design             | 10 (2%)*  | 1 (1%)                | 6 (2%)               | 3 (1%)              | 6 (2%)   | 4 (1%)   |
| Modifiability             | 2 (0%)*   | 0 (0%)                | 2 (1%)               | 0 (0%)              | 0 (0%)   | 2 (1%)   |

Note. \*  $p < .05$  versus next higher ranked attribute for total sample. <sup>a</sup>  $p < .05$  versus total sample for age groups.

Figure 1. Example of a Best-worst Scaling Case 2 Task

ENDS Best-Worst Scaling

1  
2  
3  
4  
5  
6  
7  
8  
9  
10  
11  
12  
13  
14  
15  
16  
17  
18  
19  
20  
21  
22  
23  
24  
25  
26  
27  
28  
29  
30  
31  
32  
33  
34  
35  
36  
37  
38  
39  
40  
41  
42  
43  
44  
45  
46  
47  
48  
49  
50  
51  
52  
53  
54  
55  
56  
57  
58  
59  
60

1  
2  
3  
4  
5  
6  
7  
8  
9  
10  
11  
12  
13  
14  
15  
16  
17  
18

For peer review only

Figure 2. Importance of ENDS characteristics, n=660

1  
2  
3 1  
4  
5  
6 2  
7  
8  
9 3  
10  
11  
12 4  
13  
14  
15 5  
16  
17 6  
18  
19  
20 7  
21  
22  
23 8  
24  
25 9  
26  
27  
28 10  
29  
30  
31 11  
32  
33  
34 12  
35  
36 13  
37  
38  
39 14  
40  
41  
42 15  
43  
44  
45 16  
46  
47  
48 17  
49  
50 18  
51  
52  
53 19  
54  
55  
56  
57  
58  
59  
60

Appendix Table 1. ENDS Characteristics and Definitions

For peer review only

Figure 1. Example of a Best-worst Scaling Case 2 Task

Please imagine this is a new e-cigarette that has just become available for purchase. When you look at the 5 features of the e-cigarette, which feature makes you most want to use the e-cigarette and which feature makes you least want to use the e-cigarette.

(1 of 19)

PICK ONE FROM EACH COLUMN

| E-cigarette                                                                   | Most makes me want to use | Least makes me want to use |
|-------------------------------------------------------------------------------|---------------------------|----------------------------|
| \$5 one-time purchase                                                         | <input type="radio"/>     | <input type="radio"/>      |
| It cannot be modified                                                         | <input type="radio"/>     | <input type="radio"/>      |
| Does not help me breathe easier AND still makes my clothes smell like tobacco | <input type="radio"/>     | <input type="radio"/>      |
| 5 of 10 people are able to quit tobacco cigarettes                            | <input type="radio"/>     | <input type="radio"/>      |
| Somewhat similar in size, weight appearance, and feel to a tobacco cigarette  | <input type="radio"/>     | <input type="radio"/>      |

Click the forward arrow button to continue...

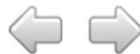0%  100%

1  
2  
3  
4  
5  
6  
7  
8  
9  
10  
11  
12  
13  
14  
15  
16  
17  
18  
19  
20  
21  
22  
23  
24  
25  
26  
27  
28  
29  
30  
31  
32  
33  
34  
35  
36  
37  
38  
39  
40  
41  
42  
43  
44  
45  
46  
47  
48  
49  
50  
51  
52  
53  
54  
55  
56  
57  
58  
59  
60

Figure 2. Importance of ENDS characteristics, n=660

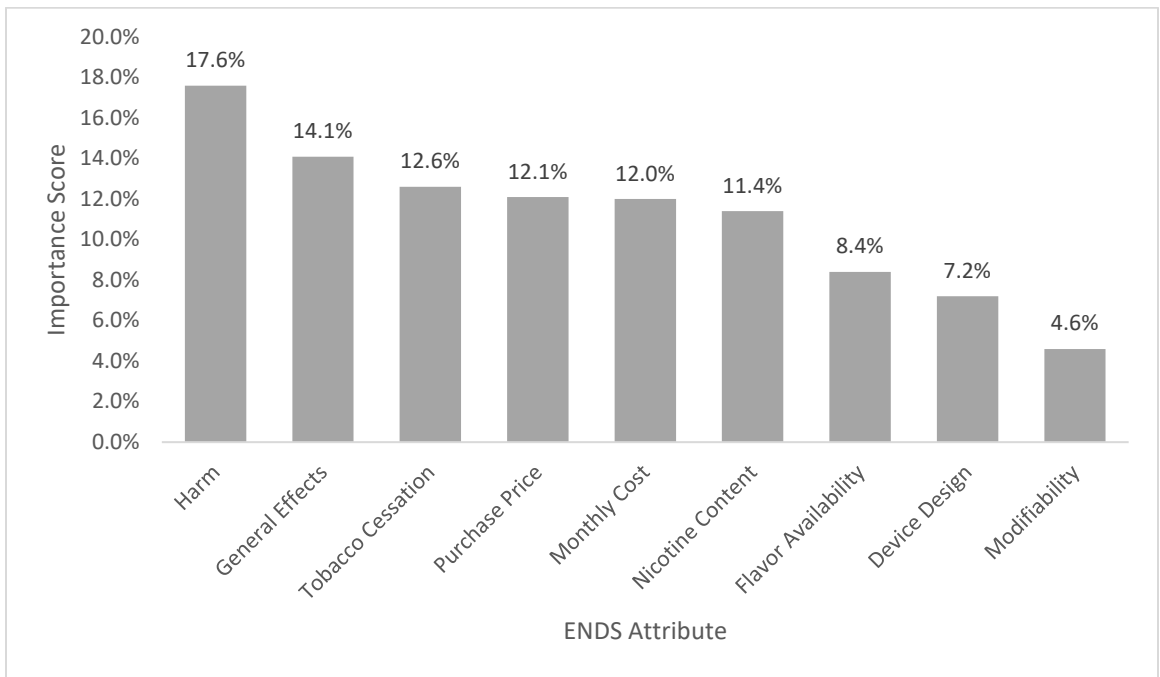

Appendix Table 1. ENDS Characteristics and Definitions

| ENDS Characteristics      | Provided Definition                                                                                                                                                                                                   |
|---------------------------|-----------------------------------------------------------------------------------------------------------------------------------------------------------------------------------------------------------------------|
| Harms of Use              | How much the device affects your health, specifically the harms to your body as compared to tobacco cigarettes. Imagine these harms are like cancer, lung diseases, circulation problems, heart attacks, and strokes. |
| General Effects of Use    | How an e-cigarette affects you overall after you use it.                                                                                                                                                              |
| Tobacco Cessation Aid     | How much the device can help a person quit using tobacco.                                                                                                                                                             |
| Purchase Price of Product | How much a person can expect to spend when starting to use the product, including the device and any other necessary pieces.                                                                                          |
| Monthly Cost of Use       | How much a person can expect to spend each month with routine use of an e-cigarette                                                                                                                                   |
| Nicotine Content          | How much nicotine is available to use in the electronic vapor product.                                                                                                                                                |
| Flavor Availability       | How many different types of e-juice flavors that the e-cigarette is available in.                                                                                                                                     |
| Device Design             | How a device looks and feels as you use it, including the feel of inhaling the device, holding the device, its appearance, and other traits.                                                                          |
| Modifiability             | Some e-cigarettes can be modified. This is how much you can alter the e-cigarette to meet your needs. This doesn't include refilling or replacing an e-juice cartridge.                                               |

1  
2  
3  
4  
5  
6  
7  
8  
9  
10  
11  
12  
13  
14  
15  
16  
17  
18  
19  
20  
21  
22  
23  
24  
25  
26  
27  
28  
29  
30  
31  
32  
33  
34  
35  
36  
37  
38  
39  
40  
41  
42  
43  
44  
45  
46  
47  
48  
49  
50  
51  
52  
53  
54  
55  
56  
57  
58  
59  
60STROBE Statement—Checklist of items that should be included in reports of *cross-sectional studies*

|                              | <b>Item No</b> | <b>Location</b>                                                                                                                                                                                                                                                                                    |
|------------------------------|----------------|----------------------------------------------------------------------------------------------------------------------------------------------------------------------------------------------------------------------------------------------------------------------------------------------------|
| <b>Title and abstract</b>    | 1              | (a) We included Discrete Choice Experiment in our title<br>(b) We included the overarching results in the abstract                                                                                                                                                                                 |
| <b>Introduction</b>          |                |                                                                                                                                                                                                                                                                                                    |
| Background/rationale         | 2              | Paragraph 1 of the manuscript, p. 6, lines 2-17                                                                                                                                                                                                                                                    |
| Objectives                   | 3              | First section of the abstract and Last paragraph of the introduction, p. 7, lines 5-12                                                                                                                                                                                                             |
| <b>Methods</b>               |                |                                                                                                                                                                                                                                                                                                    |
| Study design                 | 4              | First paragraph of the methods “study design” section, p. 7, lines 15-19                                                                                                                                                                                                                           |
| Setting                      | 5              | First paragraph of the methods, p. 7, lines 15-19                                                                                                                                                                                                                                                  |
| Participants                 | 6              | Third paragraph of the methods, “participants” section, p. 8, lines 11-16                                                                                                                                                                                                                          |
| Variables                    | 7              | Fourth, fifth, and sixth paragraph of the methods, “survey design”, “best-worst scaling attributes and levels”, and “other measures” section, p. 8 lines 18-22 and p.9, lines 1-19                                                                                                                 |
| Data sources/<br>measurement | 8*             | For each variable of interest, give sources of data and details of methods of assessment (measurement). Describe comparability of assessment methods if there is more than one group                                                                                                               |
| Bias                         | 9              | We discuss efforts to address bias including providing an explanation of the attributes, an example task, and our choice of best-worst scaling, case 2, in the “survey design” section of the methods, p 8 and 9, lines 18-22 and 1-14                                                             |
| Study size                   | 10             | A sample of 660 provides standard error of 0.0907 gave us 80% power to detect as significant utilities at least 0.25 units away from zero.                                                                                                                                                         |
| Quantitative variables       | 11             | Explained in the “other measures” section, p. 11, lines 1-7                                                                                                                                                                                                                                        |
| Statistical methods          | 12             | (a) Last paragraph of the methods, “analysis” section, p. 11, lines 9-23, and p. 12, lines 1-5<br>(b) Last sentence of the methods, “analysis” section, p. 12, lines 3-5<br>(c) Given the focus of the study on the population, missing data was censored from the analysis.<br>(d) N/A<br>(e) N/A |
| <b>Results</b>               |                |                                                                                                                                                                                                                                                                                                    |
| Participants                 | 13*            | (a) Because this is an online survey we are not able to report how many people looked at the survey or were assessed for eligibility. We do know that 900 people completed the survey of whom 660 reported ENDS use, p 13, lines 7-9<br>(b) N/A<br>(c) N/A                                         |
| Descriptive data             | 14*            | (a) Table 1 includes demographic data as well as the first paragraph of the results, p 13, lines 7-18<br>(b) Table 1 includes the demographics of interest and their reduced n                                                                                                                     |
| Outcome data                 | 15*            | “most important ENDS attribute overall and by sub-group” section in the results, p13, line 21, and p 14, lines 1- 20                                                                                                                                                                               |
| Main results                 | 16             | (a) “most important ENDS attribute overall and by sub-group” section in the results, p13, line 21, and p 14, lines 1- 20<br>(b) N/A<br>(c) N/A                                                                                                                                                     |
| Other analyses               | 17             | “most important ENDS attribute overall and by sub-group” section in the results,                                                                                                                                                                                                                   |

p13, line 21, and p 14, lines 1- 20

| <b>Discussion</b>        |    |                                                                                                                  |
|--------------------------|----|------------------------------------------------------------------------------------------------------------------|
| Key results              | 18 | Paragraph 1 of the discussion, p 14, lines 22-23 and p 15, lines 1- 7                                            |
| Limitations              | 19 | P 18, lines 19-23 and p 19, lines 1-10.                                                                          |
| Interpretation           | 20 | Discussion section contextualizes our findings within the existing literature                                    |
| Generalisability         | 21 | The ends of paragraphs 1-4 of the discussion all discuss the generalisability of the work and future directions. |
| <b>Other information</b> |    |                                                                                                                  |
| Funding                  | 22 | The acknowledgements section contains the study's funding source on p 19, lines 21-22, and p 20, lines 1-2       |

\*Give information separately for exposed and unexposed groups.

**Note:** An Explanation and Elaboration article discusses each checklist item and gives methodological background and published examples of transparent reporting. The STROBE checklist is best used in conjunction with this article (freely available on the Web sites of PLoS Medicine at <http://www.plosmedicine.org/>, Annals of Internal Medicine at <http://www.annals.org/>, and Epidemiology at <http://www.epidem.com/>). Information on the STROBE Initiative is available at [www.strobe-statement.org](http://www.strobe-statement.org).
