# Supplementary material for: Product attributes important to US adult consumers’ use of electronic nicotine delivery systems: a discrete choice experiment
Source: PubMed Central journal article supplement — BMJ Open. 2019 Aug 15;9(8):e027247. doi: 10.1136/bmjopen-2018-027247 (PMC6701580; doi:10.1136/bmjopen-2018-027247), 2019-08-15
Supplement: bmjopen-2018-027247supp001.pdf [file bmjopen-2018-027247supp001.pdf]

Appendix Table 1. ENDS Characteristics and Definitions

| ENDS Characteristics      | Provided Definition                                                                                                                                                                                                   |
|---------------------------|-----------------------------------------------------------------------------------------------------------------------------------------------------------------------------------------------------------------------|
| Harms of Use              | How much the device affects your health, specifically the harms to your body as compared to tobacco cigarettes. Imagine these harms are like cancer, lung diseases, circulation problems, heart attacks, and strokes. |
| General Effects of Use    | How an e-cigarette affects you overall after you use it.                                                                                                                                                              |
| Tobacco Cessation Aid     | How much the device can help a person quit using tobacco.                                                                                                                                                             |
| Purchase Price of Product | How much a person can expect to spend when starting to use the product, including the device and any other necessary pieces.                                                                                          |
| Monthly Cost of Use       | How much a person can expect to spend each month with routine use of an e-cigarette                                                                                                                                   |
| Nicotine Content          | How much nicotine is available to use in the electronic vapor product.                                                                                                                                                |
| Flavor Availability       | How many different types of e-juice flavors that the e-cigarette is available in.                                                                                                                                     |
| Device Design             | How a device looks and feels as you use it, including the feel of inhaling the device, holding the device, its appearance, and other traits.                                                                          |
| Modifiability             | Some e-cigarettes can be modified. This is how much you can alter the e-cigarette to meet your needs. This doesn't include refilling or replacing an e-juice cartridge.                                               |
